# Supplementary material for: Reporting of methodological studies in health research: a protocol for the development of the MethodologIcal STudy reportIng Checklist (MISTIC)
Source: PubMed Central journal article supplement — BMJ Open. 2020 Dec 17;10(12):e040478. doi: 10.1136/bmjopen-2020-040478 (PMC7747548; doi:10.1136/bmjopen-2020-040478), 2020-12-17
Supplement: bmjopen-2020-040478.draft_revisions.pdf [file bmjopen-2020-040478.draft_revisions.pdf]

# BMJ Open

BMJ Open is committed to open peer review. As part of this commitment we make the peer review history of every article we publish publicly available.

When an article is published we post the peer reviewers' comments and the authors' responses online. We also post the versions of the paper that were used during peer review. These are the versions that the peer review comments apply to.

The versions of the paper that follow are the versions that were submitted during the peer review process. They are not the versions of record or the final published versions. They should not be cited or distributed as the published version of this manuscript.

BMJ Open is an open access journal and the full, final, typeset and author-corrected version of record of the manuscript is available on our site with no access controls, subscription charges or pay-per-view fees (<http://bmjopen.bmj.com>).

If you have any questions on BMJ Open's open peer review process please email [info.bmjopen@bmj.com](mailto:info.bmjopen@bmj.com)

# BMJ Open

## Reporting of methodological studies in health research: a protocol for the development of the METHodological study ReportIng Checklist (METRIC)

|                               |                                                                                                                                                                                                                                                                                                                                                                                                                                                                                                                                                                                                                                                                                                                                                                                                                                                                                                                                                                                                                                                                                                                                                                                                                                                                                                                                                                                                                                                                                                                                                                                                                                                                                                                                                                                                                                                                                                                                                                                                                                                                                                                                                                                                                                                                                                                                                                                                                                                         |
|-------------------------------|---------------------------------------------------------------------------------------------------------------------------------------------------------------------------------------------------------------------------------------------------------------------------------------------------------------------------------------------------------------------------------------------------------------------------------------------------------------------------------------------------------------------------------------------------------------------------------------------------------------------------------------------------------------------------------------------------------------------------------------------------------------------------------------------------------------------------------------------------------------------------------------------------------------------------------------------------------------------------------------------------------------------------------------------------------------------------------------------------------------------------------------------------------------------------------------------------------------------------------------------------------------------------------------------------------------------------------------------------------------------------------------------------------------------------------------------------------------------------------------------------------------------------------------------------------------------------------------------------------------------------------------------------------------------------------------------------------------------------------------------------------------------------------------------------------------------------------------------------------------------------------------------------------------------------------------------------------------------------------------------------------------------------------------------------------------------------------------------------------------------------------------------------------------------------------------------------------------------------------------------------------------------------------------------------------------------------------------------------------------------------------------------------------------------------------------------------------|
| Journal:                      | <i>BMJ Open</i>                                                                                                                                                                                                                                                                                                                                                                                                                                                                                                                                                                                                                                                                                                                                                                                                                                                                                                                                                                                                                                                                                                                                                                                                                                                                                                                                                                                                                                                                                                                                                                                                                                                                                                                                                                                                                                                                                                                                                                                                                                                                                                                                                                                                                                                                                                                                                                                                                                         |
| Manuscript ID                 | bmjopen-2020-040478                                                                                                                                                                                                                                                                                                                                                                                                                                                                                                                                                                                                                                                                                                                                                                                                                                                                                                                                                                                                                                                                                                                                                                                                                                                                                                                                                                                                                                                                                                                                                                                                                                                                                                                                                                                                                                                                                                                                                                                                                                                                                                                                                                                                                                                                                                                                                                                                                                     |
| Article Type:                 | Protocol                                                                                                                                                                                                                                                                                                                                                                                                                                                                                                                                                                                                                                                                                                                                                                                                                                                                                                                                                                                                                                                                                                                                                                                                                                                                                                                                                                                                                                                                                                                                                                                                                                                                                                                                                                                                                                                                                                                                                                                                                                                                                                                                                                                                                                                                                                                                                                                                                                                |
| Date Submitted by the Author: | 14-May-2020                                                                                                                                                                                                                                                                                                                                                                                                                                                                                                                                                                                                                                                                                                                                                                                                                                                                                                                                                                                                                                                                                                                                                                                                                                                                                                                                                                                                                                                                                                                                                                                                                                                                                                                                                                                                                                                                                                                                                                                                                                                                                                                                                                                                                                                                                                                                                                                                                                             |
| Complete List of Authors:     | <p>Lawson, Daeria; McMaster University, Department of Health Research Methods, Evidence, and Impact</p> <p>Puljak, Livia ; Croatian Catholic University, Center for Evidence-Based Medicine and Health Care</p> <p>Pieper, Dawid; University of Witten/Herdecke, Institute for Research in Operative Medicine</p> <p>Schandelmaier, Stefan; McMaster University, Department of Health Research Methods, Evidence, and Impact; University and University Hospital of Basel, Institute for Clinical Epidemiology and Biostatistics, Department of Clinical Research</p> <p>Collins, Gary; University of Oxford, Centre for Statistics in Medicine</p> <p>Brignardello-Petersen, Romina ; McMaster University, Department of Health Research Methods, Evidence, and Impact</p> <p>Moher, David; Ottawa Hospital Research Institute, Centre for Journalology, Clinical Epidemiology Program; University of Ottawa, School of Epidemiology and Public Health, Faculty of Medicine</p> <p>Tugwell, Peter; University of Ottawa, Department of Medicine and School of Epidemiology and Public Health, Faculty of Medicine; Bruyère Research Institute</p> <p>Welch, Vivian A.; University of Ottawa, School of Epidemiology and Public Health, Faculty of Medicine; Bruyère Research Institute</p> <p>Samaan, Zainab; McMaster University, Department of Health Research Methods, Evidence, and Impact</p> <p>Thombs, Brett; McGill University, Faculty of Medicine; Jewish General Hospital, Lady Davis Institute for Medical Research</p> <p>Nørskov, Anders; Copenhagen University Hospital, Copenhagen Trial Unit</p> <p>Jakobsen, Janus; Copenhagen University Hospital, Copenhagen Trial Unit; University of Southern Denmark, Department of Regional Health Research, The Faculty of Health Sciences</p> <p>Allison, David; Indiana University Bloomington School of Public Health, Department of Epidemiology and Biostatistics</p> <p>Mayo-Wilson, Evan; Indiana University Bloomington School of Public Health, Department of Epidemiology and Biostatistics</p> <p>Young, Taryn; Stellenbosch University, Centre for Evidence-based Health Care, Faculty of Medicine and Health Sciences</p> <p>Chan, An-Wen; University of Toronto, Department of Medicine, Women's College Research Institute</p> <p>Briel, Matthias; McMaster University, Department of Health Research Methods, Evidence, and Impact; University and University Hospital of</p> |

1  
2  
3  
4  
5  
6  
7  
8  
9  
10  
11  
12  
13  
14  
15  
16  
17  
18  
19  
20  
21  
22  
23  
24  
25  
26  
27  
28  
29  
30  
31  
32  
33  
34  
35  
36  
37  
38  
39  
40  
41  
42  
43  
44  
45  
46  
47  
48  
49  
50  
51  
52  
53  
54  
55  
56  
57  
58  
59  
60

|                  |                                                                                                                                                                                                                                                                                                                                                                                                                                                                                                                                                                                                                                                                                                                   |
|------------------|-------------------------------------------------------------------------------------------------------------------------------------------------------------------------------------------------------------------------------------------------------------------------------------------------------------------------------------------------------------------------------------------------------------------------------------------------------------------------------------------------------------------------------------------------------------------------------------------------------------------------------------------------------------------------------------------------------------------|
|                  | <p>Basel, Institute for Clinical Epidemiology and Biostatistics, Department of Clinical Research<br/> Guyatt, Gordon; McMaster University, Department of Health Research Methods, Evidence, and Impact<br/> Thabane, Lehana ; McMaster University, Department of Health Research Methods, Evidence, and Impact, and Department of Paediatrics and Anaesthesia; Saint Joseph's Healthcare Hamilton, Biostatistics Unit, Father Sean O'Sullivan Research Centre and Centre for Evaluation of Medicine<br/> Mbuagbaw, Lawrence; McMaster University, Department of Health Research Methods, Evidence, and Impact; Saint Joseph's Healthcare Hamilton, Biostatistics Unit, Father Sean O'Sullivan Research Centre</p> |
| <p>Keywords:</p> | <p>STATISTICS &amp; RESEARCH METHODS, EPIDEMIOLOGY, EDUCATION &amp; TRAINING (see Medical Education &amp; Training)</p>                                                                                                                                                                                                                                                                                                                                                                                                                                                                                                                                                                                           |
|                  |                                                                                                                                                                                                                                                                                                                                                                                                                                                                                                                                                                                                                                                                                                                   |

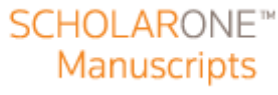

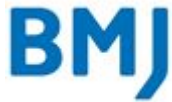

I, the Submitting Author has the right to grant and does grant on behalf of all authors of the Work (as defined in the below author licence), an exclusive licence and/or a non-exclusive licence for contributions from authors who are: i) UK Crown employees; ii) where BMJ has agreed a CC-BY licence shall apply, and/or iii) in accordance with the terms applicable for US Federal Government officers or employees acting as part of their official duties; on a worldwide, perpetual, irrevocable, royalty-free basis to BMJ Publishing Group Ltd ("BMJ") its licensees and where the relevant Journal is co-owned by BMJ to the co-owners of the Journal, to publish the Work in this journal and any other BMJ products and to exploit all rights, as set out in our [licence](#).

The Submitting Author accepts and understands that any supply made under these terms is made by BMJ to the Submitting Author unless you are acting as an employee on behalf of your employer or a postgraduate student of an affiliated institution which is paying any applicable article publishing charge ("APC") for Open Access articles. Where the Submitting Author wishes to make the Work available on an Open Access basis (and intends to pay the relevant APC), the terms of reuse of such Open Access shall be governed by a Creative Commons licence – details of these licences and which [Creative Commons](#) licence will apply to this Work are set out in our licence referred to above.

Other than as permitted in any relevant BMJ Author's Self Archiving Policies, I confirm this Work has not been accepted for publication elsewhere, is not being considered for publication elsewhere and does not duplicate material already published. I confirm all authors consent to publication of this Work and authorise the granting of this licence.

1  
2  
3 **1 Reporting of methodological studies in health research: a protocol for the development of**  
4 **2 the METHodological study ReportIng Checklist (METRIC)**

5  
6  
7  
8 3 Daeria O. Lawson<sup>1,\*</sup>, Livia Puljak<sup>2</sup>, Dawid Pieper<sup>3</sup>, Stefan Schandelmaier<sup>1,4</sup>, Gary S. Collins<sup>5</sup>,  
9  
10 4 Romina Brignardello-Petersen<sup>1</sup>, David Moher<sup>6,7</sup>, Peter Tugwell<sup>7,8,9</sup>, Vivian Welch<sup>7,8</sup>, Zainab  
11  
12 5 Samaan<sup>1</sup>, Brett D. Thombs<sup>10,11</sup>, Anders K. Nørskov<sup>12</sup>, Janus C. Jakobsen<sup>12,13</sup>, David B. Allison<sup>14</sup>,  
13  
14 6 Evan Mayo-Wilson<sup>14</sup>, Taryn Young<sup>15</sup>, An-Wen Chan<sup>16</sup>, Matthias Briel<sup>1,4</sup>, Gordon Guyatt<sup>1</sup>,  
15  
16 7 Lehana Thabane<sup>1,17,18,19,20</sup>, Lawrence Mbuagbaw<sup>1,17</sup>

17  
18  
19  
20  
21 9 <sup>1</sup> Department of Health Research Methods, Evidence, and Impact, McMaster University,  
22  
23 Hamilton, ON, Canada

24  
25  
26 11 <sup>2</sup> Center for Evidence-Based Medicine and Health Care, Catholic University of Croatia, Zagreb,  
27  
28 12 Croatia

29  
30  
31 13 <sup>3</sup> Institute for Research in Operative Medicine, Witten/Herdecke University, Cologne, Germany

32  
33 14 <sup>4</sup> Institute for Clinical Epidemiology and Biostatistics, Department of Clinical Research,  
34  
35 15 University and University Hospital of Basel, Basel, Switzerland

36  
37  
38 16 <sup>5</sup> Centre for Statistics in Medicine, Nuffield Department of Orthopaedics, Rheumatology and  
39  
40 17 Musculoskeletal Sciences, University of Oxford, Oxford, United Kingdom

41  
42 18 <sup>6</sup> Centre for Journalology, Clinical Epidemiology Program, Ottawa Hospital Research Institute,  
43  
44 19 Ottawa, ON, Canada

45  
46  
47 20 <sup>7</sup> School of Epidemiology and Public Health, Faculty of Medicine, University of Ottawa,  
48  
49 21 Ottawa, ON, Canada

50  
51 22 <sup>8</sup> Bruyère Research Institute, Ottawa, ON, Canada

52  
53  
54 23 <sup>9</sup> Department of Medicine, University of Ottawa, Ottawa, ON, Canada

- 1  
2  
3 24 <sup>10</sup> Faculty of Medicine, McGill University, Montreal, QC, Canada  
4  
5 25 <sup>11</sup> Lady Davis Institute for Medical Research, Jewish General Hospital, Montreal, QC, Canada  
6  
7 26 <sup>12</sup> Copenhagen Trial Unit, Copenhagen University Hospital, Rigshospitalet, Copenhagen,  
8  
9 Denmark  
10  
11  
12 28 <sup>13</sup> Department of Regional Health Research, The Faculty of Health Sciences, University of  
13  
14 Southern Denmark, Odense, Denmark  
15  
16 30 <sup>14</sup> Department of Epidemiology and Biostatistics, School of Public Health-Bloomington, Indiana  
17  
18 University, Bloomington, IN, United States  
19  
20 31  
21 32 <sup>15</sup> Centre for Evidence-based Health Care, Stellenbosch University, Cape Town, South Africa  
22  
23 33 <sup>16</sup> Department of Medicine, Women's College Research Institute, University of Toronto,  
24  
25 Toronto, ON, Canada  
26  
27 34  
28 35 <sup>17</sup> Biostatistics Unit, Father Sean O'Sullivan Research Centre, St. Joseph's Healthcare Hamilton,  
29  
30 Hamilton, ON, Canada  
31  
32 37 <sup>18</sup> Departments of Paediatrics and Anaesthesia, McMaster University, Hamilton, ON, Canada  
33  
34 38 <sup>19</sup> Centre for Evaluation of Medicine, St. Joseph's Healthcare Hamilton Hamilton, ON, Canada  
35  
36 39 <sup>20</sup> Population Health Research Institute, Hamilton Health Sciences, Hamilton, ON, Canada  
37  
38  
39  
40  
41

42 **\*Correspondence:** Daeria O. Lawson, Department of Health Research Methods, Evidence, and  
43  
44 Impact, Faculty of Health Sciences, McMaster University, 1280 Main Street West, Hamilton,  
45  
46 ON L8S 4K1, E-mail: [lawsod3@mcmaster.ca](mailto:lawsod3@mcmaster.ca)  
47  
48  
49  
50

51 **Word count:** 3798  
52  
53  
54  
55  
56  
57  
58  
59  
60

1  
2  
3 46 **ABSTRACT**  
4

5 47 **Introduction:** Methodological studies (i.e. studies that evaluate the design, conduct, analysis or  
6  
7  
8 48 reporting of other studies in health research) address various facets of health research including,  
9  
10 49 for instance, data collection techniques, differences in approaches to analyses, reporting quality,  
11  
12 50 adherence to guidelines, or publication bias. As a result, methodological studies can help to  
13  
14 51 identify knowledge gaps in the methodology of health research, and suggest strategies for  
15  
16 52 improvement in research practices. Differences in methodological study names and a lack of  
17  
18 53 reporting guidance contribute to lack of comparability across studies, and difficulties in  
19  
20 54 identifying relevant previous methodological studies. This paper outlines the methods we will  
21  
22 55 use to develop an evidence-based tool—the METHodological study ReportIng Checklist  
23  
24 56 (METRIC)—to harmonize naming conventions and improve the reporting of methodological  
25  
26 57 studies.  
27  
28  
29

30 58 **Methods and analysis:** We will search for methodological studies in the Cumulative Index to  
31  
32 59 Nursing and Allied Health Literature, Cochrane Library, Embase, MEDLINE, Web of Science,  
33  
34 60 check reference lists, and contact experts in the field. We will extract and summarize data on the  
35  
36 61 study names, design, and reporting features of the included methodological studies. Consensus  
37  
38 62 on study terms and recommended reporting items will be achieved via video conference  
39  
40 63 meetings with a panel of experts including researchers who have published methodological  
41  
42 64 studies.  
43  
44  
45

46 65 **Ethics and dissemination:** The consensus study has been exempt from ethics review by the  
47  
48 66 Hamilton Integrated Research Ethics Board. The results of the review and the reporting guideline  
49  
50 67 will be disseminated in stakeholder meetings, conferences, peer-reviewed publications, in  
51  
52  
53  
54  
55  
56  
57  
58  
59  
60

1  
2  
3 68 requests to journal editors (to endorse or make the guideline a requirement for authors), and on  
4  
5 69 the EQUATOR Network and METRIC websites.  
6

7  
8 70 **Registration:** We have registered the development of METRIC with the EQUATOR Network,  
9  
10 71 and publicly posted this project on the Open Science Framework ([www.osf.io/9hgbq](http://www.osf.io/9hgbq)).  
11  
12  
13  
14  
15  
16  
17  
18  
19  
20  
21  
22  
23  
24  
25  
26  
27  
28  
29  
30  
31  
32  
33  
34  
35  
36  
37  
38  
39  
40  
41  
42  
43  
44  
45  
46  
47  
48  
49  
50  
51  
52  
53  
54  
55  
56  
57  
58  
59  
60

For peer review only



1  
2  
3 72 **STRENGTHS AND LIMITATIONS OF THIS STUDY**  
4

- 5 73 • To the best of our knowledge, this is the first study to design an evidence-based tool to  
6  
7 support the complete and transparent reporting of methodological studies in health research.  
8 74  
9  
10 75 • This project will help to highlight the current reporting practices of authors of  
11  
12 methodological studies to outline a list of key reporting items.  
13 76  
14  
15 77 • The stakeholders recruited for the consensus study will represent a diverse group of expert  
16  
17 health research methodologists including biostatisticians, clinical researchers, journal  
18 78  
19 editors, healthcare providers, and reporting guideline developers.  
20 79  
21  
22 80 • Our study does not incorporate a blinded consensus process and this may impact the flow of  
23  
24 discussions during the conference meetings.  
25 81  
26  
27  
28  
29  
30  
31  
32  
33  
34  
35  
36  
37  
38  
39  
40  
41  
42  
43  
44  
45  
46  
47  
48  
49  
50  
51  
52  
53  
54  
55  
56  
57  
58  
59  
60

## 82 INTRODUCTION

83 Concerns with the quality and quantity of research have sparked interest in the rapidly evolving  
84 field which has been called meta-epidemiology, meta-research, or research-on-research [1-3].  
85 This field of research addresses the entire research process, from question development to  
86 design, conduct and reporting issues, and most often uses research-related reports (e.g. protocols,  
87 published manuscripts, registry entries, conference abstracts) as the unit of analysis. These  
88 studies have also been previously described as systematic reviews that “(1) describe the  
89 distribution of research evidence for a specific question; (2) examine heterogeneity and  
90 associated risk factors; and (3) control bias across studies and summarize research evidence as  
91 appropriate” [4]. For the purpose of this project, we will refer to these research outputs as  
92 “methodological studies”, i.e. studies that evaluate the design, conduct, analysis (including bias),  
93 or reporting of other studies in health research. This definition does not include statistical  
94 methodological studies (e.g. studies testing new algorithms or analytical methods, simulation  
95 studies, and experimental studies in which the unit of analysis is not a research report).  
96 Methodological studies are important because they can identify gaps, biases, and inefficiencies in  
97 research practices, and propose improvements and solutions. A PubMed search performed in  
98 April 2020 for terms often used to describe methodological studies suggests that the rate of  
99 publication of methodological studies has increased over time, illustrated in Figure 1.

100 — Figure 1. Trends in methodological studies indexed in PubMed from 2009 to 2019. —

101 In the past 20 years, methodological studies have influenced the conduct of health  
102 research by informing many popular practices such as double data extraction in systematic  
103 reviews [5]; optimal approaches to conducting subgroup analyses [6]; and reporting of  
104 randomized trials, observational studies, pilot studies, and systematic reviews [7-10] to name a

1  
2  
3 105 few. Methodological studies have played an important role in ensuring that health research is  
4  
5 106 reliable, valid, transparent and replicable. These types of studies may investigate: bias in research  
6  
7 107 [11, 12], quality or completeness of reporting [13, 14], consistency of reporting [15], methods  
8  
9 108 used [16], factors associated with reporting practices [17]; and may provide summaries of other  
10  
11 109 methodological studies [18], and other issues. Methodological studies may also be used to  
12  
13 110 evaluate the uptake of methods over time to investigate whether (and where) practices are  
14  
15 111 improving and allow researchers to make comparisons across different medical areas [19, 20].  
16  
17 112 These studies can also highlight methodological strengths and shortcomings such as sample size  
18  
19 113 calculations in randomized controlled trials [21, 22], quality of clinical prediction models [23],  
20  
21 114 and spin and over-interpretation of study findings [24-26]. As such, methodological studies  
22  
23 115 promote robust, evidence-based science and help to discard inefficient research practices [27]. A  
24  
25 116 draft conceptual framework of the various categories of methodological studies that we have  
26  
27 117 observed is outlined in Figure 2. Broadly, some categories of methodological studies include  
28  
29 118 those investigating: bias and spin, methodological approaches to study design, or reporting  
30  
31 119 issues.

32  
33  
34  
35  
36  
37  
38 120 — Figure 2. Draft conceptual framework of categories of methodological studies. —  
39

40 121 Despite the importance of methodological studies, there is no guidance for their  
41  
42 122 reporting. Murad and Wang have suggested a modification to the Preferred Reporting Items for  
43  
44 123 Systematic Reviews and Meta-Analyses (PRISMA), a widely used reporting tool that is  
45  
46 124 sometimes used for methodological studies because these studies often use methods that are also  
47  
48 125 used in systematic reviews [28]. Although useful for reporting some aspects of methodological  
49  
50 126 studies, the modified PRISMA approach does not fully address the many types of questions that  
51  
52 127 methodological studies attempt to answer, and the specific methods and results of these studies.  
53  
54  
55  
56  
57  
58  
59  
60

1  
2  
3 128 Studies that include a random sample of research reports [29], or those structured as before-after  
4  
5 129 investigations [19] are examples of methodological studies that would be a poor fit for the  
6  
7  
8 130 modified PRISMA tool, which is best suited for studies designed in the style of systematic  
9  
10 131 reviews. Likewise, studies in which the unit of analysis is not the “study” require more specific  
11  
12 132 guidance (e.g. when investigating multiple subgroup analyses or multiple outcomes within the  
13  
14  
15 133 same study) [30]. Thus, guidelines for transparent reporting of methodological studies are  
16  
17 134 needed, and this need is widely acknowledged in the scientific community [31, 32]

18  
19 135 Our work will address two main concerns:

- 20  
21 136 1. There are no globally accepted names for methodological studies, making them difficult to  
22  
23 137 identify. Methodological studies have been called ‘methodological review’, ‘systematic  
24  
25 138 review’, ‘systematic survey’, ‘literature review’, ‘meta-epidemiological study’ and many  
26  
27 139 other names. The diversity in names compromises training and educational activities [33], and  
28  
29 140 it makes it difficult for end-users (e.g. clinical researchers, guideline developers) to search for,  
30  
31 141 identify and use these studies [34, 35].
- 32  
33 142 2. The reporting of methodological studies is inconsistent, which may relate to differences in  
34  
35 143 objectives, and to differences in transparency and completeness. That is, some studies may be  
36  
37 144 better reported than others. While the most appropriate approach to reporting will depend on  
38  
39 145 the research question, explicit, user-friendly, and consensus-based guidance is needed to  
40  
41 146 ensure that methodological studies are reported transparently and comprehensively [36].

#### 42 43 44 45 46 147 ***Aims***

47  
48  
49 148 The aims of this study protocol are to outline the procedures to define and harmonize the names  
50  
51 149 describing methodological studies, and to develop reporting guidelines for methodological  
52  
53 150 studies in human health research.  
54  
55  
56  
57  
58

## 151 **METHODS AND ANALYSIS**

### 152 *Study design*

153 We have adopted the strategy for the development of reporting guidelines proposed by Moher et  
154 al. [37]. A visual overview of this approach, highlighting key components of the process, is  
155 presented in Figure 3. The three parts of the project which will be addressed using the above  
156 strategy are outlined in detail below (see Supplementary File for an outline of the data flow  
157 informing subsequent parts of the project).

158 — Figure 3. Project overview for the development of reporting guidelines for methodological  
159 studies in health research. —

### 160 **Part 1: Methodological Review**

161 The objectives of this part are to: a) identify names used to describe methodological studies, b)  
162 identify the various designs, analysis and reporting features of methodological studies, c) find  
163 any previous reporting guidance, and d) identify methodological study experts.

### 164 *Search strategy*

165 We developed a search strategy informed by our pilot work [38] targeting health-related sciences  
166 and biomedicine databases: Cumulative Index to Nursing and Allied Health Literature  
167 (CINAHL), Cochrane Library, Excerpta Medica (Embase), MEDLINE, and Web of Science. We  
168 will limit our search to the last complete ten years (2009-2019). There will be no limits by  
169 publication type or language. We will perform searches for authors known to publish in this  
170 field, check reference lists of relevant studies, check existing methodological study repositories  
171 (Studies Within a Trial [SWATs] and Studies Within a Review [SWARs]), preprints (bioRxiv  
172 and medRxiv), setup Google Alerts for key words (e.g. meta-epidemiology, research-on-  
173 research), and contact experts (e.g. via email, meetings, following relevant journals, subscribing

1  
2  
3 174 to methods email newsletters including the Methods in Research on Research [MiRoR] and the  
4  
5 175 National Institute for Health and Care Excellence [NICE] groups, and following researchers on  
6  
7 176 social media platforms such as ResearchGate and Twitter) to identify additional methodological  
8  
9 177 studies. We will also check the EQUATOR library to identify any published or under  
10  
11 178 development reporting guidance. These approaches are informed by previous work and  
12  
13 179 published literature [35, 38]. Two health sciences librarians at the Health Sciences Library  
14  
15 180 (McMaster University) were consulted and reviewed the final search strategy (see  
16  
17 181 Supplementary File) in line with the Peer Review of Electronic Search Strategies (PRESS)  
18  
19 182 framework [39].  
20  
21  
22  
23

### 24 183 ***Eligible studies***

25  
26 184 Studies that investigate methods—design, conduct, analysis, or reporting—in other studies of  
27  
28 185 health research in humans will be eligible. The ‘other studies’ (or research reports) refers to the  
29  
30 186 unit of analysis of the methodological studies (e.g. abstracts, cohort studies, randomized trials,  
31  
32 187 registry records, study protocols, systematic reviews). Only published protocols and final reports  
33  
34 188 of studies that investigate methods will be eligible. Statistical methodological studies will not be  
35  
36 189 eligible (e.g. studies testing new algorithms/analytical methods and simulation studies in which  
37  
38 190 the unit of analysis is not another research report).  
39  
40  
41

### 42 191 ***Screening***

43  
44 192 A team of reviewers led by DOL will screen titles and abstracts independently, in duplicate in  
45  
46 193 *Rayyan* [40], and full-texts in standardized forms in *DistillerSR* [41]. Both are online  
47  
48 194 collaborative platforms for screening and reviewing literature. We will measure agreement on  
49  
50 195 screening and study inclusion using Cohen’s Kappa statistic [42, 43]. Any discrepancies between  
51  
52 196 reviewers will be resolved through discussion.  
53  
54  
55  
56  
57  
58  
59  
60

197 **Data extraction**

198 In order to document the current reporting practices we will extract data from included studies  
 199 independently, in duplicate based on a standardized data collection form. Key data extraction  
 200 fields for documenting methodological study features and reporting practices (e.g. study design  
 201 name, databases search, any guideline use) are outlined in Table 1. All data will be compiled in  
 202 *DistillerSR*. Any discrepancies between reviewers will be resolved through discussion.

203 **Table 1.** Overview of data extraction fields for the review.

| Section       | Data to be collected                                                                                                                                                                                                                                                                                                                                                                                                                                                                                                                     |
|---------------|------------------------------------------------------------------------------------------------------------------------------------------------------------------------------------------------------------------------------------------------------------------------------------------------------------------------------------------------------------------------------------------------------------------------------------------------------------------------------------------------------------------------------------------|
| Bibliometrics | <ul style="list-style-type: none"> <li>• Corresponding or last author (first and last name) and contact information (email address). We will first verify whether the corresponding author has academic faculty status, and if not, we will contact the last author</li> <li>• Country of author</li> <li>• Publication year</li> <li>• Study design name in title (verbatim quotation/descriptor)</li> <li>• Type of article (protocol or final publication, and letter/brief report or full publication)</li> <li>• Journal</li> </ul> |
| Methods       | <ul style="list-style-type: none"> <li>• Study design name in methods section (verbatim quotation/descriptor)</li> <li>• Objectives (verbatim quotation)</li> <li>• Outcomes (verbatim quotation)</li> <li>• Search strategy reported (yes/no)</li> <li>• Search time limits and justifications (yes/no and verbatim quotation)</li> <li>• Databases searched</li> </ul>                                                                                                                                                                 |

|            |                                                                                                                                                                                                                                                                                                                                                                                                                                                                                 |
|------------|---------------------------------------------------------------------------------------------------------------------------------------------------------------------------------------------------------------------------------------------------------------------------------------------------------------------------------------------------------------------------------------------------------------------------------------------------------------------------------|
|            | <ul style="list-style-type: none"> <li>• Included research report types (e.g. randomized trials, systematic reviews, cohort studies)</li> <li>• Sampling method (where applicable)</li> <li>• Analysis type (e.g. correlation, descriptive, regression, time-series)</li> <li>• Reporting guidance used and justification (yes/no, name and verbatim quotation)</li> <li>• Prospective registration and existence of a published protocol (yes/no, where applicable)</li> </ul> |
| Results    | <ul style="list-style-type: none"> <li>• Presence of flow diagrams (yes/no)</li> <li>• Total records screened and included</li> <li>• Type of final synthesis performed (qualitative, quantitative, both)</li> </ul>                                                                                                                                                                                                                                                            |
| Discussion | <ul style="list-style-type: none"> <li>• Intended use of findings (verbatim quotation)</li> <li>• Limitations (verbatim quotation)</li> </ul>                                                                                                                                                                                                                                                                                                                                   |
| Other      | <ul style="list-style-type: none"> <li>• Conflicts of interest (yes/no)</li> <li>• Funding type (e.g. industry, institutional, non-profit)</li> <li>• Provide access to data (yes/no)</li> </ul>                                                                                                                                                                                                                                                                                |

204

205 All reviewers will undergo calibration exercises and pilot the screening and data  
 206 collection forms (25 studies per reviewer). We will incorporate an emergent design in the data  
 207 collection stage of the review, which is characterized by a flexibility in the methodology,  
 208 allowing researchers to remain open to modifications [44]. Should any new information that is of  
 209 interest arise during the full-text screen or data extraction, we will update the data collection  
 210 form and collect this information for all studies retrospectively and going forward. Any  
 211 modifications to the present protocol will be reported in the final published review. This iterative  
 212 approach will allow for the capture of information as new methodological study design features



1  
2  
3 213 come to light during the full-text screening and data extraction phases. Based on this approach,  
4  
5 214 data extraction will be updated accordingly for previously reviewed studies as needed. For  
6  
7  
8 215 example, we expect to see overlaps in methodological study names, some of which might be  
9  
10 216 attributed to collaborating research groups. There also appear to be similarities in methodological  
11  
12 217 study reporting styles that are borrowed from systematic review [4] or survey study designs,  
13  
14 218 which have both been extensively developed and are omnipresent in health research literature.  
15  
16  
17 219 However, if the current data collection fields, listed in Table 1, are insufficient to capture the  
18  
19 220 nuances of the varieties of methodological studies, we will revise our data collection forms  
20  
21 221 accordingly and collect the data for all studies.

### 22 223 ***Generation of a list of candidate items***

23  
24 223 The generation of a list of candidate items will be informed by two sources. First, a list of  
25  
26 224 reporting items will be compiled based on what has been reported by authors of the included  
27  
28 225 studies in the methodological review (e.g. flow diagram, search strategy). We will also note the  
29  
30 226 use of any reporting guidance as mentioned by authors (e.g. PRISMA, STrengthening the  
31  
32 227 Reporting of OBservational studies in Epidemiology [STROBE]). Each item will be ranked from  
33  
34 228 most frequently reported to those less frequently reported. Second, this list will be presented to  
35  
36 229 expert user stakeholders alongside the proportion of methodological studies that report on each  
37  
38 230 item. Stakeholders will be asked to propose additional relevant items to finalize the list of  
39  
40 231 candidate reporting items for Part 2.

### 41 232 ***Data analysis***

42 233 We will present the flow of articles retrieved and screened in a study flow diagram, and  
43  
44 234 summarize data in tables with explanatory text. We will provide descriptive statistics, i.e. counts  
45  
46 235 (percentage) for categorical data, and means (standard deviation [SD]) or medians (interquartile  
47  
48  
49  
50  
51  
52  
53  
54  
55  
56  
57  
58  
59  
60

1  
2  
3 236 range [IQR]) for continuous data. In addition to study names, we will synthesize and tabulate  
4  
5 237 verbatim quotations for the study objectives, outcomes, and intended use of findings to provide  
6  
7  
8 238 context and clarification for methodological study rationales [48]. We will qualitatively group  
9  
10 239 studies into categories based on similarities in reporting features. All statistical analyses will be  
11  
12 240 done in *STATA version 15.1* [46]. We will identify additional potential stakeholders from the list  
13  
14  
15 241 of authors of included studies.  
16  
17 242

## 19 243 **Part 2: Consensus Study**

21 244 This part of the project will consist of consultation with expert user stakeholders in a consensus  
22  
23 245 study. The objectives are to define methodological studies, and outline the recommended study  
24  
25 246 name(s) and best reporting practices. The project steering group (DOL, GG, LM, LT), which  
26  
27 247 includes members with expertise in health research methods, will oversee the consensus study  
28  
29 248 and development of the reporting guideline.  
30  
31

### 33 249 ***Identification of stakeholders***

35 250 The steering group will be responsible for identifying expert user stakeholders based on expertise  
36  
37 251 with methodological studies and expertise with reporting guideline development [49]. Additional  
38  
39 252 stakeholders will be identified from the list of authors (either corresponding or senior, with  
40  
41 253 academic faculty-status) of methodological studies from the review. In our selection of  
42  
43 254 stakeholders, we will seek individuals who will be committed to participating and providing  
44  
45 255 feedback for the reporting guideline. We define expert user stakeholders as researchers involved  
46  
47 256 in the design, conduct, analysis, interpretation, or dissemination of methodological studies.  
48  
49 257 Approximately 20-30 stakeholders will be selected (including the protocol authors) as  
50  
51 258 participants in the consensus exercises. We will track response rates to invitations to participate  
52  
53  
54  
55  
56  
57  
58  
59  
60

259 in the consensus study. We will collect participant demographics (e.g. country, primary job title,  
260 academic rank, and methodological study publication history) to provide insight into the  
261 representation in this field of research based on sociocultural factors.

### 262 ***Measuring agreement and achieving consensus***

263 The above definition of methodological studies (i.e. studies that evaluate the design, conduct,  
264 analysis, or reporting of other studies in health research) will be used during the online consensus  
265 exercises and video conference meetings. Participants will discuss the following: a) names for  
266 methodological studies, b) categories of methodological studies, and c) reporting requirements.  
267 These three components, outlined in Table 2, will be completed electronically through a  
268 McMaster Ethics Compliant service, *LimeSurvey* (<https://reo.mcmaster.ca/limesurvey>) for online  
269 surveys [50].

270 **Table 2.** Overview of consensus study activities and expected outputs.

| Stage                                                               | Description of activities to be completed                                                                                                                                                                                                                                                                                                                                                                                                                                                                | Expected outputs                                                                                              |
|---------------------------------------------------------------------|----------------------------------------------------------------------------------------------------------------------------------------------------------------------------------------------------------------------------------------------------------------------------------------------------------------------------------------------------------------------------------------------------------------------------------------------------------------------------------------------------------|---------------------------------------------------------------------------------------------------------------|
| Online consensus exercise:<br>categories of methodological studies* | <ul style="list-style-type: none"> <li>We will present the <b>proposed categories of methodological studies</b> (i.e. based on the aim, design, sampling strategy and unit of analysis) with rationale for each. For each category (e.g. methodological studies that evaluate study design; methodological studies that evaluate reporting practices) an example of studies that belong in each category will also be presented. An example of potential categories are outlined in Figure 2.</li> </ul> | <ul style="list-style-type: none"> <li>List of ‘appropriate’ categories for methodological studies</li> </ul> |

|  |                                                                                                                                                                                                                                                                                                                                                                                                                                                                                                                                                                                                                                                                                                                                                                                                                                                                                                                                                                                                                                                                                  |  |
|--|----------------------------------------------------------------------------------------------------------------------------------------------------------------------------------------------------------------------------------------------------------------------------------------------------------------------------------------------------------------------------------------------------------------------------------------------------------------------------------------------------------------------------------------------------------------------------------------------------------------------------------------------------------------------------------------------------------------------------------------------------------------------------------------------------------------------------------------------------------------------------------------------------------------------------------------------------------------------------------------------------------------------------------------------------------------------------------|--|
|  | <ul style="list-style-type: none"><li>• Participants will be asked to rate and comment on the appropriateness of each category on a 3-point ordinal scale: 3- appropriate; 2- somewhat appropriate; 1- inappropriate</li><li>• A validity ratio (VR) will be computed as follows:<br/><math display="block">VR = \frac{(Ne - N/2)}{(N/2)}</math> where <math>Ne</math> is the number of participants who indicated that the category was appropriate (i.e., a rating of “3”) and <math>N</math> is the total number of participants. This ratio will indicate the category that at least half of the participants consider appropriate. The VR will be interpreted based on a table of critical values [51]. For example, for 30 participants (<math>N = 30</math>), the critical value is 0.33 (i.e., at least 20 participants must deem the category appropriate). Only items based on a critical value greater than the set threshold will be considered further [52]. This approach allows consensus to be achieved remotely, and makes decision-making objective.</li></ul> |  |
|--|----------------------------------------------------------------------------------------------------------------------------------------------------------------------------------------------------------------------------------------------------------------------------------------------------------------------------------------------------------------------------------------------------------------------------------------------------------------------------------------------------------------------------------------------------------------------------------------------------------------------------------------------------------------------------------------------------------------------------------------------------------------------------------------------------------------------------------------------------------------------------------------------------------------------------------------------------------------------------------------------------------------------------------------------------------------------------------|--|

|                                                                                                                                                                                                                                                |                                                                                                                                                                                                                                                                                                                                                                                                                                                                 |                                                                                                                                                                           |
|------------------------------------------------------------------------------------------------------------------------------------------------------------------------------------------------------------------------------------------------|-----------------------------------------------------------------------------------------------------------------------------------------------------------------------------------------------------------------------------------------------------------------------------------------------------------------------------------------------------------------------------------------------------------------------------------------------------------------|---------------------------------------------------------------------------------------------------------------------------------------------------------------------------|
| <p>1<br/>2<br/>3<br/>4<br/>5<br/>6<br/>7<br/>8<br/>9<br/>10<br/>11<br/>12<br/>13<br/>14<br/>15<br/>16<br/>17<br/>18<br/>19<br/>20<br/>21<br/>22<br/>23<br/>24<br/>25</p> <p>Online consensus exercise: name(s) for methodological studies*</p> | <ul style="list-style-type: none"> <li>• We will present the <b>names of methodological studies</b> and for each name (i.e. meta-epidemiological study, systematic survey etc.), an example of a study using that name will be provided.</li> <li>• Participants will be asked to rate the appropriateness of each potential name on a 3-point ordinal scale, and VR will be computed:<br/>3- appropriate; 2- somewhat appropriate; 1- inappropriate</li> </ul> | <ul style="list-style-type: none"> <li>• List of ‘appropriate’ names for methodological studies</li> </ul>                                                                |
| <p>26<br/>27<br/>28<br/>29<br/>30<br/>31<br/>32<br/>33<br/>34<br/>35<br/>36<br/>37<br/>38<br/>39<br/>40<br/>41<br/>42<br/>43<br/>44<br/>45<br/>46<br/>47</p> <p>Online consensus exercise: reporting items*</p>                                | <ul style="list-style-type: none"> <li>• We will present the <b>proposed reporting items</b> and participants will be asked to rate the usefulness of each item on a 3-point ordinal scale, and VR will be computed:<br/>3- essential; 2- maybe essential; 1- not essential</li> <li>• Participants will be asked to indicate if each reporting item applies to each different methodological study category.</li> </ul>                                        | <ul style="list-style-type: none"> <li>• List of ‘essential’ reporting items for methodological studies</li> </ul>                                                        |
| <p>48<br/>49<br/>50<br/>51<br/>52<br/>53<br/>54<br/>55<br/>56<br/>57<br/>58<br/>59<br/>60</p> <p>First video conference meeting (two</p>                                                                                                       | <ul style="list-style-type: none"> <li>• Participants will confirm the appropriate name(s) and categories for methodological studies, and agree on reporting items that should be included or excluded, and</li> </ul>                                                                                                                                                                                                                                          | <ul style="list-style-type: none"> <li>• First drafts of the: <ul style="list-style-type: none"> <li>a) reporting checklist</li> <li>b) user guide</li> </ul> </li> </ul> |

|                                             |                                                                                                                                                                                                                                                                                                                                                                                                                                                                                                                                                                                                                                                                                                                                                                                                                                                                                                                                                                                                      |                                                                                                                                                                             |
|---------------------------------------------|------------------------------------------------------------------------------------------------------------------------------------------------------------------------------------------------------------------------------------------------------------------------------------------------------------------------------------------------------------------------------------------------------------------------------------------------------------------------------------------------------------------------------------------------------------------------------------------------------------------------------------------------------------------------------------------------------------------------------------------------------------------------------------------------------------------------------------------------------------------------------------------------------------------------------------------------------------------------------------------------------|-----------------------------------------------------------------------------------------------------------------------------------------------------------------------------|
| <p>calls<sup>†</sup>, 2 hours each)</p>     | <p>discuss the rationales behind their selections. All participants will be required to come to a consensus to include an item.</p> <ul style="list-style-type: none"> <li>• Meeting minutes and summary of the discussion and decisions will be shared with participants to provide additional feedback after the meeting.</li> <li>• Based on these discussions and decisions, the steering group will develop a <b>first draft of the reporting checklist</b> (e.g. with a checkbox to indicate Yes/Reported, No/Not Reported, and a space to indicate on what page the information is reported).</li> <li>• The checklist will be divided into different reporting sections in a methodological study (e.g. Introduction, Methods, Results, Discussion).</li> <li>• Examples of how to report information for each item will be provided alongside the checklist as part of the <b>draft user guide</b>. This will be shared with participants for comment prior to the next meeting.</li> </ul> | <p>c) recommended methodological study name(s) and categories</p>                                                                                                           |
| <p>Second video conference meeting (two</p> | <ul style="list-style-type: none"> <li>• Participants will agree on a structure and format for the checklist (e.g. general layout, decision tree to delineate the</li> </ul>                                                                                                                                                                                                                                                                                                                                                                                                                                                                                                                                                                                                                                                                                                                                                                                                                         | <ul style="list-style-type: none"> <li>• Revised drafts of the: <ul style="list-style-type: none"> <li>a) reporting checklist</li> <li>b) user guide</li> </ul> </li> </ul> |

|                                                                                                                                                                                                                                                                            |                                                                                                                                                                                                                                                                                                                                                                                                                                                                                                                                                                                                                   |                                                                                                                                                                                                                                                                                                  |
|----------------------------------------------------------------------------------------------------------------------------------------------------------------------------------------------------------------------------------------------------------------------------|-------------------------------------------------------------------------------------------------------------------------------------------------------------------------------------------------------------------------------------------------------------------------------------------------------------------------------------------------------------------------------------------------------------------------------------------------------------------------------------------------------------------------------------------------------------------------------------------------------------------|--------------------------------------------------------------------------------------------------------------------------------------------------------------------------------------------------------------------------------------------------------------------------------------------------|
| <p>calls<sup>†</sup>, 2 hours each)</p>                                                                                                                                                                                                                                    | <p>category of the methodological study, core items for each category of methodological study, optional items). The group will also review the examples of reporting to be included in the user guide for each reporting item.</p> <ul style="list-style-type: none"> <li>• Meeting minutes and summary of the discussion and decisions will be shared with participants to provide additional feedback after the meeting.</li> <li>• Based on these discussions and decisions, the steering group will develop a <b>revised draft of the reporting checklist</b> and an <b>elaborated user guide</b>.</li> </ul> | <p>c) recommended methodological study name(s) and categories</p>                                                                                                                                                                                                                                |
| <p>Final video conference meeting (4 hours)</p>                                                                                                                                                                                                                            | <ul style="list-style-type: none"> <li>• Discussion with participants will focus on confirming rationales for the final selected items, and providing examples for each reporting item to be outlined in the consensus statement and elaboration.</li> </ul>                                                                                                                                                                                                                                                                                                                                                      | <ul style="list-style-type: none"> <li>• Final documents for the: <ul style="list-style-type: none"> <li>a) reporting checklist</li> <li>b) user guide</li> <li>c) recommended methodological study name(s) and categories</li> </ul> </li> <li>• Consensus statement and elaboration</li> </ul> |
| <p>* During the online exercises, participants can suggest additional categories, names, or items that they wish to discuss during the video conferences.<br/> <sup>†</sup> Two calls will be scheduled to accommodate stakeholders in Eastern and Western time zones.</p> |                                                                                                                                                                                                                                                                                                                                                                                                                                                                                                                                                                                                                   |                                                                                                                                                                                                                                                                                                  |

271

1  
2  
3 272 All video conferences will be facilitated by two investigators (DOL and LM).  
4  
5 273 Stakeholders will be consulted for the development of drafts, elaborations and explanations for  
6  
7 274 specific items. All steering committee members and stakeholders will be required to participate  
8  
9 275 and vote during the consensus meetings. Disagreements will be resolved through discussion, and  
10  
11 276 if no consensus can be reached, the steering committee will convey the recommendations for the  
12  
13 277 stakeholder group to approve. *Zoom*, or comparable video conferencing software, will be used to  
14  
15 278 allow for the collection of recordings [53].  
16  
17  
18

### 19 279 ***Data analysis***

20  
21 280 Findings from the consensus exercise will be summarized descriptively in tables that include  
22  
23 281 counts (percentage) for categorical data, and means (SD) or medians (IQR) for continuous data.  
24  
25 282 We will measure the levels of agreement (i.e. percentage increase in agreement for successive  
26  
27 283 rounds, number of comments made for each successive round, and rounds with emergence of  
28  
29 284 new themes) and instability (i.e. spread and SD of ranked responses for each item) for each  
30  
31 285 round [54]. After the online exercises, one investigator (DOL) will qualitatively synthesize and  
32  
33 286 code the suggestions for the methodological study names, categories and reporting items into  
34  
35 287 common themes in *Dedoose*, a qualitative research software [55]. The steering committee will  
36  
37 288 synthesize data from the participant discussions to revise each subsequent draft.  
38  
39  
40  
41  
42  
43

### 44 290 **Part 3: Reporting Guideline**

45  
46 291 The objectives of this part are to develop, refine, publish, and disseminate the reporting guideline  
47  
48 292 for methodological studies. We have registered the development of the reporting guideline—  
49  
50 293 METHodological study ReportIng Checklist (METRIC)—with the EQUATOR Network [56].  
51  
52 294 This record may see updates to its name and acronym after deliberations during the consensus  
53  
54  
55  
56  
57  
58  
59  
60



1  
2  
3 295 study. We will also consider which reporting items are appropriate for different categories of  
4  
5 296 methodological studies. This will include discussions about whether a decision tree may be  
6  
7 297 useful to direct users to other existing reporting guidelines should they be more appropriate for  
8  
9 298 specific categories of methodological studies (e.g. STROBE for methodological studies designed  
10  
11 299 as cohort studies). Quantitative and qualitative findings from the consensus study will be  
12  
13 300 incorporated into the final guideline document to include the: a) recommended methodological  
14  
15 301 study name(s) and categories, b) recommended checklist with agreed upon reporting items, c)  
16  
17 302 user guide and elaboration (e.g. an explanation of why it is important, rationales and an example  
18  
19 303 of how it can be presented in a methodological study), and d) consensus statement. The draft  
20  
21 304 document will be returned to the steering group and stakeholders to collect additional feedback.  
22  
23 305 The checklist will be tested with end-users for face validity and clarity, and for additional fine-  
24  
25 306 tuning as needed prior to publication. We will distribute the finalized checklist to a group of  
26  
27 307 authors of methodological studies identified from the review (Part 1) to assess its usefulness and  
28  
29 308 whether the checklist appropriately captures items relevant to the reporting of methodological  
30  
31 309 studies [57].

### 310 *Patient and public involvement*

311 Although patients and the general public are not directly involved in this project, the findings of  
312 this research will be relevant to a broad range of knowledge users including methodological  
313 study authors, health researchers, methodologists, statisticians, and journal editors. We will seek  
314 recommendations from investigators for general public members and patients that could be  
315 recruited for this project.

316

## 317 **ETHICS AND DISSEMINATION**

1  
2  
3 318 This research has received an exemption (October 2019) from the Hamilton Integrated Research  
4  
5 319 Ethics Board (HiREB) for the consensus study. Ethics committee approval and consent to  
6  
7  
8 320 participate is not required for any other component of this project since only previously  
9  
10 321 published data will be used.

### 11 12 322 ***Data deposition and curation***

13  
14 323 All participant records and data will be stored in MacDrive, a secure cloud storage drive that is  
15  
16 324 privately hosted and based in-house at McMaster University [58]. Only two researchers (DOL  
17  
18 325 and LM) will have direct access to study related documents and source data. Qualitative data will  
19  
20 326 be promptly coded and transcribed, and all audio files will be encrypted. As part of our  
21  
22 327 knowledge translation (KT) strategy and a consequence of the difficulties we faced in retrieving  
23  
24 328 methodological studies from literature databases during our pilot work, we have developed an  
25  
26 329 open-access database of methodological studies ([www.methodsresearch.ca](http://www.methodsresearch.ca)). We will catalogue  
27  
28 330 all included studies from the pilot and full reviews on this website such that end-users can easily  
29  
30 331 retrieve these studies. We have also setup a submission portal for researchers to submit their  
31  
32 332 studies to be catalogued in this database. Parallel research by our colleagues will use this  
33  
34 333 database as well as explore the automation of retrieving and indexing methodological studies in a  
35  
36 334 dedicated space [59]. Lastly, we will setup a complementary website to serve as the primary  
37  
38 335 repository for the published reporting guideline document.

### 39 40 336 ***Dissemination***

41  
42 337 We will publish all manuscripts arising from this research and present the findings at  
43  
44 338 conferences. We will setup a complementary website to serve as the primary repository for the  
45  
46 339 published reporting guideline document. The inclusion of knowledge users and representatives  
47  
48 340 from methodology journals and guideline groups on our core study team will aid the wide  
49  
50  
51  
52  
53  
54  
55  
56  
57  
58  
59  
60

1  
2  
3 341 dissemination of the reporting guideline. We continue to contact journal editors for their  
4  
5 342 endorsement, and encourage researchers to reach out to us about this work, as we have done  
6  
7  
8 343 previously [34]. We will also encourage user feedback to inform future updates of the guideline  
9  
10 344 as needed. These approaches are informed by our collective experience in developing and  
11  
12 345 disseminating health research guidelines [7, 60-64].  
13  
14  
15 346

## 16 17 347 **DISCUSSION**

18  
19 348 Our work is contributing to reducing research waste by: 1) making methodological studies  
20  
21 349 transparent through streamlining their reporting; 2) permitting researchers to appraise  
22  
23 350 methodological studies based on adherence to proposed guidelines; 3) allowing end-users of  
24  
25 351 methodological studies to be able to locate inaccessible research in a dedicated database and  
26  
27 352 promoting its continued development; and in doing so 4) allowing end-users of methodological  
28  
29 353 studies to better evaluate and identify issues with study design and reporting that influence  
30  
31 354 patient health, enabling them to apply methodological study evidence to their own research  
32  
33 355 practices. Many methodological studies are done to improve the design, conduct, analysis and  
34  
35 356 reporting of primary and secondary research. We anticipate that, in reviewing this body of  
36  
37 357 evidence on research methods, we will further highlight the importance of studies that aim to  
38  
39 358 improve the design of health research [65].  
40  
41  
42  
43

### 44 359 ***Strengths and limitations***

45  
46 360 We acknowledge that there are inherent challenges in the search and retrieval of studies that lack  
47  
48 361 consistent names, or dedicated indexing in common health research databases. As such, it is  
49  
50 362 plausible that certain methodological studies that use terms not previously identified in the pilot  
51  
52 363 or from our systematic database searches may be missed. To mitigate this limitation, we will  
53  
54  
55  
56  
57  
58  
59  
60

1  
2  
3 364 (and have already) contact(ed) experts in the field to identify additional studies, and screen  
4  
5 365 references and citing articles of relevant studies. We have consulted extensively with librarians at  
6  
7 366 the McMaster Health Sciences Library on optimal approaches to capture the maximum number  
8  
9  
10 367 of studies.

11  
12 368 The uncertainty in the number of methodological studies that are currently available and  
13  
14 369 published in the literature can present additional logistic and timing constraints to the review  
15  
16  
17 370 component and overall progress of this work. However, given the landscape of methodological  
18  
19 371 studies, we believe it is essential to apply a comprehensive search. To help with the organization  
20  
21 372 of screening and data extraction, we will use robust systematic review management software  
22  
23 373 (*DistillerSR*) [41]. Further, we have designed all screening and data extraction prompts to ensure  
24  
25 374 consistency and replicability of our work.

26  
27  
28 375 Lastly, our study does not incorporate a blinded consensus process and this may impact  
29  
30 376 the flow of discussions during the video conference meetings. We will aim to regulate  
31  
32 377 discussions such that dominant speakers do not steer the discussion and ensuring that all  
33  
34 378 participants have a chance to speak. Additionally, we will share summaries of the discussion and  
35  
36 379 decisions after the meetings. This will allow for participants to privately provide any additional  
37  
38 380 written feedback to the steering group that may not have been addressed.

39  
40  
41  
42 381 A key strength of this research is the diversity of our study team. We have brought  
43  
44 382 together an international, multidisciplinary team with expertise in consensus activities and  
45  
46 383 guideline development, and research methodology and synthesis. This gives us an advantage in  
47  
48 384 the breadth of feedback and fruitful discussions to be had with a wide array of users of the  
49  
50 385 forthcoming guideline. Given the rise in the conduct of methodological studies, a general call for  
51  
52 386 guidelines in the scientific community, and the number of teams that have reached out to us with  
53  
54  
55  
56  
57  
58  
59  
60

1  
2  
3 387 interest in participating in this work, we are confident that the guideline will be used. However,  
4  
5 388 we fully acknowledge the factors associated with implementation and use of guidelines, notably  
6  
7 389 journal endorsement of the guidelines, the passage of time and other study level characteristics  
8  
9  
10 390 [20, 66-70]. Therefore, our stakeholders include editors from key journals that publish  
11  
12 391 methodological studies such as the *Journal of Clinical Epidemiology*, *BMC Medical Research*  
13  
14 392 *Methodology*, *BMC Systematic Reviews*, *The Campbell Collaboration*, and *Cochrane*.  
15  
16 393 Stakeholders also include representatives from academic programs building capacity, at the  
17  
18 394 master's and doctoral level, in conducting methodological research. To encourage better uptake,  
19  
20 395 it has been suggested that researchers should work collaboratively with journals in the  
21  
22 396 prospective design, knowledge translation, and evaluation of reporting guidelines [71], as well as  
23  
24 397 following up on user feedback and incorporating a system to revise the reporting guidelines  
25  
26 398 when necessary [72]. These strategies have been incorporated in our KT plan.  
27  
28  
29  
30  
31 399

## 32 33 400 **CONCLUSIONS**

34  
35 401 This research will improve the transparency of reporting of methodological studies, and help  
36  
37 402 streamline their indexing and easier retrieval in literature databases. This work stands to make a  
38  
39 403 substantial impact by informing research reporting standards for studies that investigate the  
40  
41 404 design, conduct, analysis, or reporting of other health studies, and thereby improving the  
42  
43 405 transparency, reliability and replicability of health research, and ultimately benefitting patients  
44  
45 406 and decision makers. Future efforts will focus on field-testing the published checklist with  
46  
47 407 authors of methodological studies, gathering feedback from end-users, and optimizing and  
48  
49 408 adapting the checklist for different typologies of methodological studies as needed.  
50  
51  
52  
53  
54  
55  
56  
57  
58  
59  
60

409 **REFERENCES**

- 410 1. Chalmers I, Glasziou P: Avoidable waste in the production and reporting of research  
411 evidence. *Lancet* 2009, 374(9683):86-89.
- 412 2. Chan AW, Song F, Vickers A, Jefferson T, Dickersin K, Gotzsche PC, Krumholz HM,  
413 Gherzi D, van der Worp HB: Increasing value and reducing waste: addressing  
414 inaccessible research. *Lancet* 2014, 383(9913):257-266.
- 415 3. Ioannidis JP, Greenland S, Hlatky MA, Khoury MJ, Macleod MR, Moher D, Schulz KF,  
416 Tibshirani R: Increasing value and reducing waste in research design, conduct, and  
417 analysis. *Lancet* 2014, 383(9912):166-175.
- 418 4. Bae JM: Meta-epidemiology. *Epidemiol Health* 2014, 36:e2014019.
- 419 5. Buscemi N, Hartling L, Vandermeer B, Tjosvold L, Klassen TP: Single data extraction  
420 generated more errors than double data extraction in systematic reviews. *J Clin*  
421 *Epidemiol* 2006, 59(7):697-703.
- 422 6. Sun X, Briel M, Busse JW, You JJ, Akl EA, Mejza F, Bala MM, Bassler D, Mertz D,  
423 Diaz-Granados N *et al*: Credibility of claims of subgroup effects in randomised  
424 controlled trials: systematic review. *BMJ* 2012, 344:e1553.
- 425 7. Moher D, Liberati A, Tetzlaff J, Altman DG, Group P: Preferred reporting items for  
426 systematic reviews and meta-analyses: the PRISMA statement. *J Clin Epidemiol* 2009,  
427 62(10):1006-1012.
- 428 8. Schulz KF, Altman DG, Moher D, Group C: CONSORT 2010 statement: updated  
429 guidelines for reporting parallel group randomised trials. *BMJ* 2010, 340:c332.
- 430 9. von Elm E, Altman DG, Egger M, Pocock SJ, Gotzsche PC, Vandenbroucke JP, Initiative  
431 S: The Strengthening the Reporting of Observational Studies in Epidemiology

- 1  
2  
3 432 (STROBE) statement: guidelines for reporting observational studies. *J Clin Epidemiol*  
4  
5 433 2008, 61(4):344-349.  
6  
7  
8 434 10. Thabane L, Hopewell S, Lancaster GA, Bond CM, Coleman CL, Campbell MJ, Eldridge  
9  
10 435 SM: Methods and processes for development of a CONSORT extension for reporting  
11  
12 436 pilot randomized controlled trials. *Pilot Feasibility Stud* 2016, 2:25.  
13  
14  
15 437 11. Babic A, Vuka I, Saric F, Prolosic I, Slapnicar E, Cavar J, Poklepovic Pericic T, Pieper  
16  
17 438 D, Puljak L: Overall bias methods and their use in sensitivity analysis of Cochrane  
18  
19 439 reviews were not consistent. *J Clin Epidemiol* 2019, 119:57-64.  
20  
21  
22 440 12. Ritchie A, Seubert L, Clifford R, Perry D, Bond C: Do randomised controlled trials  
23  
24 441 relevant to pharmacy meet best practice standards for quality conduct and reporting? A  
25  
26 442 systematic review. *Int J Pharm Pract* 2019.  
27  
28  
29 443 13. Croitoru DO, Huang Y, Kurdina A, Chan AW, Drucker AM: Quality of reporting in  
30  
31 444 systematic reviews published in dermatology journals. *Br J Dermatol* 2019.  
32  
33  
34 445 14. Khan MS, Ochani RK, Shaikh A, Vaduganathan M, Khan SU, Fatima K, Yamani N,  
35  
36 446 Mandrola J, Doukky R, Krasuski RA: Assessing the Quality of Reporting of Harms in  
37  
38 447 Randomized Controlled Trials Published in High Impact Cardiovascular Journals. *Eur*  
39  
40 448 *Heart J Qual Care Clin Outcomes* 2019.  
41  
42  
43 449 15. Rosmarakis ES, Soteriades ES, Vergidis PI, Kasiakou SK, Falagas ME: From conference  
44  
45 450 abstract to full paper: differences between data presented in conferences and journals.  
46  
47 451 *Faseb j* 2005, 19(7):673-680.  
48  
49  
50 452 16. Mueller M, D'Addario M, Egger M, Cevallos M, Dekkers O, Mugglin C, Scott P:  
51  
52 453 Methods to systematically review and meta-analyse observational studies: a systematic  
53  
54 454 scoping review of recommendations. *BMC Med Res Methodol* 2018, 18(1):44.  
55  
56  
57  
58  
59  
60

- 1  
2  
3 455 17. Farrokhyar F, Chu R, Whitlock R, Thabane L: A systematic review of the quality of  
4  
5 456 publications reporting coronary artery bypass grafting trials. *Can J Surg* 2007, 50(4):266-  
6  
7 457 277.
- 8  
9  
10 458 18. Li G, Abbade LPF, Nwosu I, Jin Y, Leenus A, Maaz M, Wang M, Bhatt M, Zielinski L,  
11  
12 459 Sanger N *et al*: A scoping review of comparisons between abstracts and full reports in  
13  
14 460 primary biomedical research. *BMC Med Res Methodol* 2017, 17(1):181.
- 15  
16  
17 461 19. Kuriyama A, Takahashi N, Nakayama T: Reporting of critical care trial abstracts: a  
18  
19 462 comparison before and after the announcement of CONSORT guideline for abstracts.  
20  
21 463 *Trials* 2017, 18(1):32.
- 22  
23  
24 464 20. Mbuagbaw L, Thabane M, Vanniyasingam T, Borg Debono V, Kosa S, Zhang S, Ye C,  
25  
26 465 Parpia S, Dennis BB, Thabane L: Improvement in the quality of abstracts in major  
27  
28 466 clinical journals since CONSORT extension for abstracts: a systematic review. *Contemp*  
29  
30 467 *Clin Trials* 2014, 38(2):245-250.
- 31  
32  
33 468 21. Armijo-Olivo S, Fuentes J, da Costa BR, Saltaji H, Ha C, Cummings GG: Blinding in  
34  
35 469 Physical Therapy Trials and Its Association with Treatment Effects: A Meta-  
36  
37 470 epidemiological Study. *Am J Phys Med Rehabil* 2017, 96(1):34-44.
- 38  
39  
40 471 22. Kovic B, Zoratti MJ, Michalopoulos S, Silvestre C, Thorlund K, Thabane L: Deficiencies  
41  
42 472 in addressing effect modification in network meta-analyses: a meta-epidemiological  
43  
44 473 survey. *J Clin Epidemiol* 2017, 88:47-56.
- 45  
46  
47 474 23. Deliu N, Cottone F, Collins GS, Anota A, Efficace F: Evaluating methodological quality  
48  
49 475 of Prognostic models Including Patient-reported Health outcomes in oncology  
50  
51 476 (EPIPHANY): a systematic review protocol. *BMJ Open* 2018, 8(10):e025054.
- 52  
53  
54  
55  
56  
57  
58  
59  
60



- 1  
2  
3 477 24. Kosa SD, Mbuagbaw L, Borg Debono V, Bhandari M, Dennis BB, Ene G, Leenus A, Shi  
4  
5 478 D, Thabane M, Valvasori S *et al*: Agreement in reporting between trial publications and  
6  
7 479 current clinical trial registry in high impact journals: A methodological review. *Contemp*  
8  
9 480 *Clin Trials* 2018, 65:144-150.
- 11  
12 481 25. Schandelmaier S, Chang Y, Devasenapathy N, Devji T, Kwong JSW, Colunga Lozano  
13  
14 482 LE, Lee Y, Agarwal A, Bhatnagar N, Ewald H *et al*: A systematic survey identified 36  
15  
16 483 criteria for assessing effect modification claims in randomized trials or meta-analyses. *J*  
17  
18 484 *Clin Epidemiol* 2019, 113:159-167.
- 20  
21 485 26. Zhang Y, Florez ID, Colunga Lozano LE, Aloweni FAB, Kennedy SA, Li A, Craigie S,  
22  
23 486 Zhang S, Agarwal A, Lopes LC *et al*: A systematic survey on reporting and methods for  
24  
25 487 handling missing participant data for continuous outcomes in randomized controlled  
26  
27 488 trials. *J Clin Epidemiol* 2017, 88:57-66.
- 29  
30 489 27. Ioannidis JPA: Meta-research: Why research on research matters. *PLoS Biol* 2018,  
31  
32 490 16(3):e2005468.
- 34  
35 491 28. Murad MH, Wang Z: Guidelines for reporting meta-epidemiological methodology  
36  
37 492 research. *Evid Based Med* 2017, 22(4):139-142.
- 39  
40 493 29. El Dib R, Tikkinen KAO, Akl EA, Gomaa HA, Mustafa RA, Agarwal A, Carpenter CR,  
41  
42 494 Zhang Y, Jorge EC, Almeida R *et al*: Systematic survey of randomized trials evaluating  
43  
44 495 the impact of alternative diagnostic strategies on patient-important outcomes. *J Clin*  
45  
46 496 *Epidemiol* 2017, 84:61-69.
- 48  
49 497 30. Tanniou J, van der Tweel I, Teerenstra S, Roes KC: Subgroup analyses in confirmatory  
50  
51 498 clinical trials: time to be specific about their purposes. *BMC Med Res Methodol* 2016,  
52  
53 499 16:20.

- 1  
2  
3 500 31. Puljak L: Methodological studies evaluating evidence are not systematic reviews. *J Clin*  
4  
5 501 *Epidemiol* 2019, 110:98-99.  
6  
7  
8 502 32. Granholm A, Anthon CT, Perner A, Laake JH, Moller MH: Transparent and systematic  
9  
10 503 reporting of meta-epidemiological studies. *J Clin Epidemiol* 2019, 112:93-95.  
11  
12 504 33. Rice DB, Moher D: Curtailing the Use of Preregistration: A Misused Term. *Perspect*  
13  
14 505 *Psychol Sci* 2019, 14(6):1105-1108.  
15  
16  
17 506 34. Lawson DO, Thabane L, Mbuagbaw L: A call for consensus guidelines on classification  
18  
19 507 and reporting of methodological studies. *J Clin Epidemiol* 2020.  
20  
21 508 35. Penning de Vries BBL, van Smeden M, Rosendaal FR, Groenwold RHH: Title, abstract  
22  
23 509 and keyword searching resulted in poor recovery of articles in systematic reviews of  
24  
25 510 epidemiologic practice. *J Clin Epidemiol* 2020.  
26  
27  
28 511 36. Puljak L: Reporting checklist for methodological, that is, research on research studies is  
29  
30 512 urgently needed. *J Clin Epidemiol* 2019, 112:93.  
31  
32  
33 513 37. Moher D, Schulz KF, Simera I, Altman DG: Guidance for developers of health research  
34  
35 514 reporting guidelines. *PLoS Med* 2010, 7(2):e1000217.  
36  
37  
38 515 38. Lawson DO, Leenus A, Mbuagbaw L: Mapping the nomenclature, methodology, and  
39  
40 516 reporting of studies that review methods: a pilot methodological review. *Pilot Feasibility*  
41  
42 517 *Stud* 2020, 6(13):1-11.  
43  
44  
45 518 39. McGowan J, Sampson M, Salzwedel DM, Cogo E, Foerster V, Lefebvre C: PRESS Peer  
46  
47 519 Review of Electronic Search Strategies: 2015 Guideline Statement. *J Clin Epidemiol*  
48  
49 520 2016, 75:40-46.  
50  
51 521 40. Ouzzani M, Hammady H, Fedorowicz Z, Elmagarmid A: Rayyan-a web and mobile app  
52  
53 522 for systematic reviews. *Syst Rev* 2016, 5(1):210.  
54  
55  
56  
57  
58  
59  
60

- 1  
2  
3 523 41. DistillerSR. In. Ottawa, Canada: Evidence Partners; 2019.  
4  
5 524 42. Viera AJ, Garrett JM: Understanding interobserver agreement: the kappa statistic. *Fam*  
6  
7  
8 525 *Med* 2005, 37(5):360-363.  
9  
10 526 43. Cohen J: A Coefficient of Agreement for Nominal Scales. *Educational and*  
11  
12 527 *Psychological Measurement* 1960, 20(1):37-46.  
13  
14 528 44. Hesse-Biber SN, Leavy P: Handbook of emergent methods. New York: Guilford Press;  
15  
16 529 2008.  
17  
18  
19 530 45. Greenacre MJ: Correspondence analysis in practice, Third edition. edn. Boca Raton: CRC  
20  
21 531 Press, Taylor & Francis Group; 2017.  
22  
23 532 46. Stata Statistical Software. In., vol. Release 15.1. College Station, TX: StataCorp LLC;  
24  
25 533 2018.  
26  
27  
28 534 47. Borgatti SP: NetDraw software for network visualization. In. Lexington, KY: Analytic  
29  
30 535 Technologies; 2002.  
31  
32  
33 536 48. Corden A, Sainsbury R, Unit UoYSPR: Using Verbatim Quotations in Reporting  
34  
35 537 Qualitative Social Research: Researchers' Views: University of York, Social Policy  
36  
37 538 Research Unit; 2006.  
38  
39  
40 539 49. Jones J, Hunter D: Consensus methods for medical and health services research. *BMJ*  
41  
42 540 1995, 311(7001):376-380.  
43  
44  
45 541 50. LimeSurvey: an open source survey tool. In. Hamburg, Germany: Limesurvey GmbH;  
46  
47 542 2019.  
48  
49 543 51. Ayre C, Scally AJ: Critical values for Lawshe's content validity ratio: revisiting the  
50  
51 544 original methods of calculation. *Measurement and Evaluation in Counseling and*  
52  
53 545 *Development* 2014, 47(1):79-86.  
54  
55  
56  
57  
58  
59  
60

- 1  
2  
3 546 52. Wilson FR, Pan W, Schumsky DA: Recalculation of the critical values for Lawshe's  
4  
5 547 content validity ratio. *Measurement and Evaluation in Counseling and Development*  
6  
7 548 2012, 45(3):197-210.
- 8  
9  
10 549 53. Zoom Video Communications, Inc. In. San Jose, United States; 2020.
- 11  
12 550 54. Holey EA, Feeley JL, Dixon J, Whittaker VJ: An exploration of the use of simple  
13  
14 551 statistics to measure consensus and stability in Delphi studies. *BMC Med Res Methodol*  
15  
16 552 2007, 7:52.
- 17  
18  
19 553 55. Dedoose: web application for managing, analyzing, and presenting qualitative and mixed  
20  
21 554 method research data. In., 7.0.23 edn. Los Angeles, CA: SocioCultural Research  
22  
23 555 Consultants, LLC; 2016.
- 24  
25  
26 556 56. METRIC - METHodological sTudy ReportIng Checklist: guidelines for reporting  
27  
28 557 methodological studies in health research [[http://www.equator-](http://www.equator-network.org/library/reporting-guidelines-under-development/reporting-guidelines-under-development-for-other-study-designs/#METRIC)  
29  
30 558 [network.org/library/reporting-guidelines-under-development/reporting-guidelines-under-](http://www.equator-network.org/library/reporting-guidelines-under-development/reporting-guidelines-under-development-for-other-study-designs/#METRIC)  
31  
32 559 [development-for-other-study-designs/#METRIC](http://www.equator-network.org/library/reporting-guidelines-under-development/reporting-guidelines-under-development-for-other-study-designs/#METRIC)]
- 33  
34  
35 560 57. Streiner DL, Norman GR, Cairney J: Health measurement scales : a practical guide to  
36  
37 561 their development and use, Fifth edition. edn. Oxford: Oxford University Press; 2015.
- 38  
39  
40 562 58. MacDrive. In. Hamilton, ON: McMaster University; 2019.
- 41  
42 563 59. SNSF - P3 Research Database: Project 190566 [<http://p3.snf.ch/Project-190566>]
- 43  
44  
45 564 60. Collins GS, Reitsma JB, Altman DG, Moons KG: Transparent Reporting of a  
46  
47 565 multivariable prediction model for Individual Prognosis or Diagnosis (TRIPOD): the  
48  
49 566 TRIPOD statement. *Ann Intern Med* 2015, 162(1):55-63.
- 50  
51  
52  
53  
54  
55  
56  
57  
58  
59  
60

- 1  
2  
3 567 61. Eldridge SM, Chan CL, Campbell MJ, Bond CM, Hopewell S, Thabane L, Lancaster GA,  
4  
5 568 group Pc: CONSORT 2010 statement: extension to randomised pilot and feasibility trials.  
6  
7 569 *Pilot Feasibility Stud* 2016, 2:64.  
8  
9  
10 570 62. Guyatt GH, Oxman AD, Vist GE, Kunz R, Falck-Ytter Y, Alonso-Coello P, Schunemann  
11  
12 571 HJ, Group GW: GRADE: an emerging consensus on rating quality of evidence and  
13  
14 572 strength of recommendations. *BMJ* 2008, 336(7650):924-926.  
15  
16  
17 573 63. Welch V, Petticrew M, Tugwell P, Moher D, O'Neill J, Waters E, White H, group PR-  
18  
19 574 EB: PRISMA-Equity 2012 extension: reporting guidelines for systematic reviews with a  
20  
21 575 focus on health equity. *PLoS Med* 2012, 9(10):e1001333.  
22  
23  
24 576 64. Wolff RF, Moons KGM, Riley RD, Whiting PF, Westwood M, Collins GS, Reitsma JB,  
25  
26 577 Kleijnen J, Mallett S, Groupdagger P: PROBAST: A Tool to Assess the Risk of Bias and  
27  
28 578 Applicability of Prediction Model Studies. *Ann Intern Med* 2019, 170(1):51-58.  
29  
30  
31 579 65. Hardwicke TE, Serghiou S, Janiaud P, Danchev V, Crüwell S, Goodman SN, Ioannidis  
32  
33 580 JPA: Calibrating the scientific ecosystem through meta-research. *Annual Review of*  
34  
35 581 *Statistics and Its Application* 2020, 7(1).  
36  
37  
38 582 66. Bastuji-Garin S, Sbidian E, Gaudy-Marqueste C, Ferrat E, Roujeau JC, Richard MA,  
39  
40 583 Canoui-Poitrine F, European Dermatology N: Impact of STROBE statement publication  
41  
42 584 on quality of observational study reporting: interrupted time series versus before-after  
43  
44 585 analysis. *PLoS One* 2013, 8(8):e64733.  
45  
46  
47 586 67. Jin Y, Sanger N, Shams I, Luo C, Shahid H, Li G, Bhatt M, Zielinski L, Bantoto B, Wang  
48  
49 587 M *et al*: Does the medical literature remain inadequately described despite having  
50  
51 588 reporting guidelines for 21 years? - A systematic review of reviews: an update. *J*  
52  
53 589 *Multidiscip Healthc* 2018, 11:495-510.  
54  
55  
56  
57  
58  
59  
60

- 1  
2  
3 590 68. Mills EJ, Wu P, Gagnier J, Devereaux PJ: The quality of randomized trial reporting in  
4  
5 591 leading medical journals since the revised CONSORT statement. *Contemp Clin Trials*  
6  
7 592 2005, 26(4):480-487.  
8  
9  
10 593 69. Moher D, Jones A, Lepage L, Group C: Use of the CONSORT statement and quality of  
11  
12 594 reports of randomized trials: a comparative before-and-after evaluation. *JAMA* 2001,  
13  
14 595 285(15):1992-1995.  
15  
16  
17 596 70. Samaan Z, Mbuagbaw L, Kosa D, Borg Debono V, Dillenburg R, Zhang S, Fruci V,  
18  
19 597 Dennis B, Bawor M, Thabane L: A systematic scoping review of adherence to reporting  
20  
21 598 guidelines in health care literature. *J Multidiscip Healthc* 2013, 6:169-188.  
22  
23  
24 599 71. Stevens A, Shamseer L, Weinstein E, Yazdi F, Turner L, Thielman J, Altman DG, Hirst  
25  
26 600 A, Hoey J, Palepu A *et al*: Relation of completeness of reporting of health research to  
27  
28 601 journals' endorsement of reporting guidelines: systematic review. *BMJ* 2014, 348:g3804.  
29  
30  
31 602 72. Page MJ, Moher D: Evaluations of the uptake and impact of the Preferred Reporting  
32  
33 603 Items for Systematic reviews and Meta-Analyses (PRISMA) Statement and extensions: a  
34  
35 604 scoping review. *Syst Rev* 2017, 6(1):263.  
36  
37  
38 605

1  
2  
3 **606 AUTHORS' CONTRIBUTIONS**  
4

5 607 DOL and LM conceived the idea. DOL, GG, LM and LT contributed to the design of the study.  
6  
7 608 DOL wrote the first draft of the manuscript. AKN, AWC, BDT, DBA, DM, DP, EMW, GG,  
8  
9 609 GSC, JCJ, LM, LP, LT, MB, PT, RBP, SS, TY, VW and ZS contributed to the refinement of the  
10  
11 610 study methods and critical revision of the manuscript. All authors read and approved the final  
12  
13 611 version of the manuscript.  
14  
15  
16  
17  
18

19 **613 FUNDING**  
20

21 614 This research received no specific grant from any funding agency in the public, commercial or  
22  
23 615 not-for-profit sectors. This project is being carried out as part of a doctoral dissertation by DOL.  
24  
25 616 DOL is supported by an Ontario Graduate Scholarship and the Queen Elizabeth II Graduate  
26  
27 617 Scholarship in Science & Technology administered through McMaster University, and the  
28  
29 618 Ontario Drug Policy Research Network Student Training Program. The funders had no influence  
30  
31 619 over the design, data collection, analysis, interpretation, preparation of or decision to publish the  
32  
33 620 manuscript.  
34  
35  
36  
37  
38  
39

40 **622 COMPETING INTERESTS**  
41

42 623 All study authors have published methodological studies.  
43  
44 624

45  
46  
47 **625 ACKNOWLEDGEMENTS**  
48

49 626 We would like to thank Denise Smith and Jack Young at the Health Sciences Library at  
50  
51 627 McMaster University for their critical review of the search strategy. We would like to thank Dr.  
52  
53  
54  
55  
56  
57  
58

1  
2  
3 628 Susan Jack at the School of Nursing at McMaster University for sharing her expertise and  
4  
5 629 recommendations on qualitative and mixed methods research design.  
6  
7  
8  
9  
10  
11  
12  
13  
14  
15  
16  
17  
18  
19  
20  
21  
22  
23  
24  
25  
26  
27  
28  
29  
30  
31  
32  
33  
34  
35  
36  
37  
38  
39  
40  
41  
42  
43  
44  
45  
46  
47  
48  
49  
50  
51  
52  
53  
54  
55  
56  
57  
58  
59  
60

For peer review only



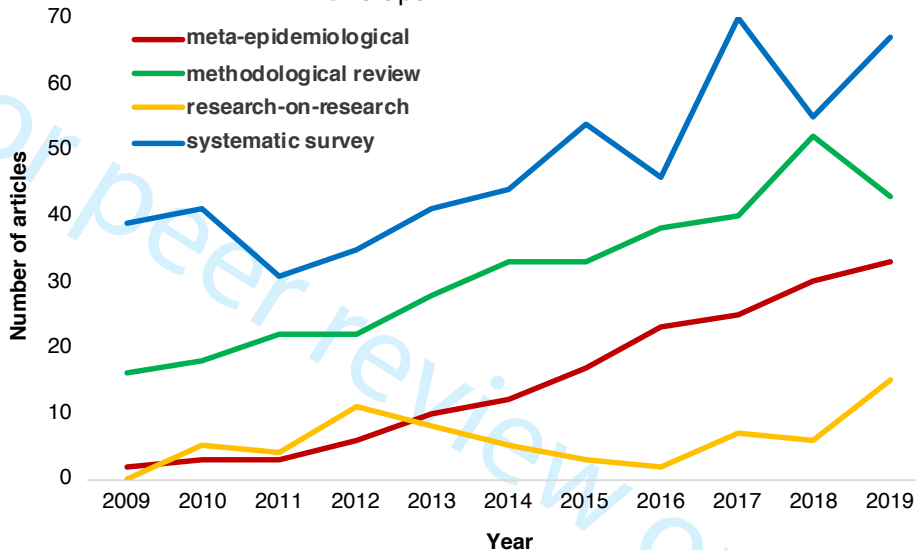

For peer review only - <http://bmjopen.bmj.com/site/about/guidelines.xhtml>

|                              | 2009 | 2010 | 2011 | 2012 | 2013 | 2014 | 2015 | 2016 | 2017 | 2018 | 2019 |
|------------------------------|------|------|------|------|------|------|------|------|------|------|------|
| <b>meta-epidemiological</b>  | 2    | 3    | 3    | 6    | 10   | 12   | 17   | 23   | 25   | 30   | 33   |
| <b>methodological review</b> | 16   | 18   | 22   | 22   | 28   | 33   | 33   | 38   | 40   | 52   | 43   |
| <b>research-on-research</b>  | 0    | 5    | 4    | 11   | 8    | 5    | 3    | 2    | 7    | 6    | 15   |
| <b>systematic survey</b>     | 39   | 41   | 31   | 35   | 41   | 44   | 54   | 46   | 70   | 55   | 67   |

# Methodological Studies

## Features of methodological studies

### Study Aim

*(purpose is to investigate...)*

### Study Design

*(cross-sectional or over time)*

### Sampling Strategy

*(from a target population)*

### Unit of Analysis

## Categories of the feature

1. Bias
2. Methods
3. Reporting
4. Summarize

1. Descriptive
2. Analytical

1. Obtain all
2. Obtain sample

1. Design or analysis type
2. Research record type

## Examples of categories or the factors investigated

1. in **primary studies**, e.g. trial registry vs. final manuscript; in **secondary studies**, e.g. meta-bias
2. **describe** or **test** new methods; **compare** methods
3. **quality**, e.g. adherence to guidelines (CONSORT); **consistency**, e.g. abstract vs. full-text
4. **summarize data** from other methodological studies

1. **outline characteristics**, e.g. survey of randomized trials at predefined timepoint(s)
2. **evaluate groups or change over time**, e.g. different databases, timepoint; **pool data**, e.g. evaluate outcomes via synthesis

1. **systematic search and screen**, e.g. all eligible cohort studies on topic
2. **consecutive sampling**, e.g. first 150 trials on topic; **purposeful sample**, e.g. all eligible abstracts from designated journal(s); **random sample**, e.g. randomized selection from all eligible records

1. **design type**, e.g. randomized trial; **analysis type**, e.g. dose-response meta-analysis
2. **record type**, e.g. abstract, published manuscript, protocol document, registry entry

1. **Identifying the need for a guideline, review of the literature and obtain funding** for the guideline initiative

- Identify previous relevant guidance
- Establish feasibility for full review of methodological studies
- Complete full review of methodological studies
- Funding sought

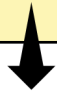

2. Pre-meeting activities including **identification of stakeholders, a consensus exercise, and generation of a list of items** for consideration at the face-to-face meeting

- Establish working group, identification of stakeholders
- Share full review findings
- Ethics, online consensus exercise, and generation of a list of candidate items

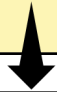

3. **Face-to-face consensus meeting and discussion of a knowledge translation strategy**

- Conduct video conference meetings and final consensus meeting
- Share guideline (draft)
- Collect feedback

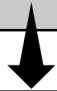

4. Post-meeting activities including development and **publication of the guidance** statement

- Disseminate guideline (final)

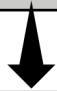

5. Post-publication activities including **encouragement of endorsement, adherence, web site development and translation of the guideline**

- Build and populate database of methodological studies
- Knowledge translation strategies for guideline, website and database

**SUPPLEMENTARY FILE**

**Flow of data for informing subsequent stages of the project:**

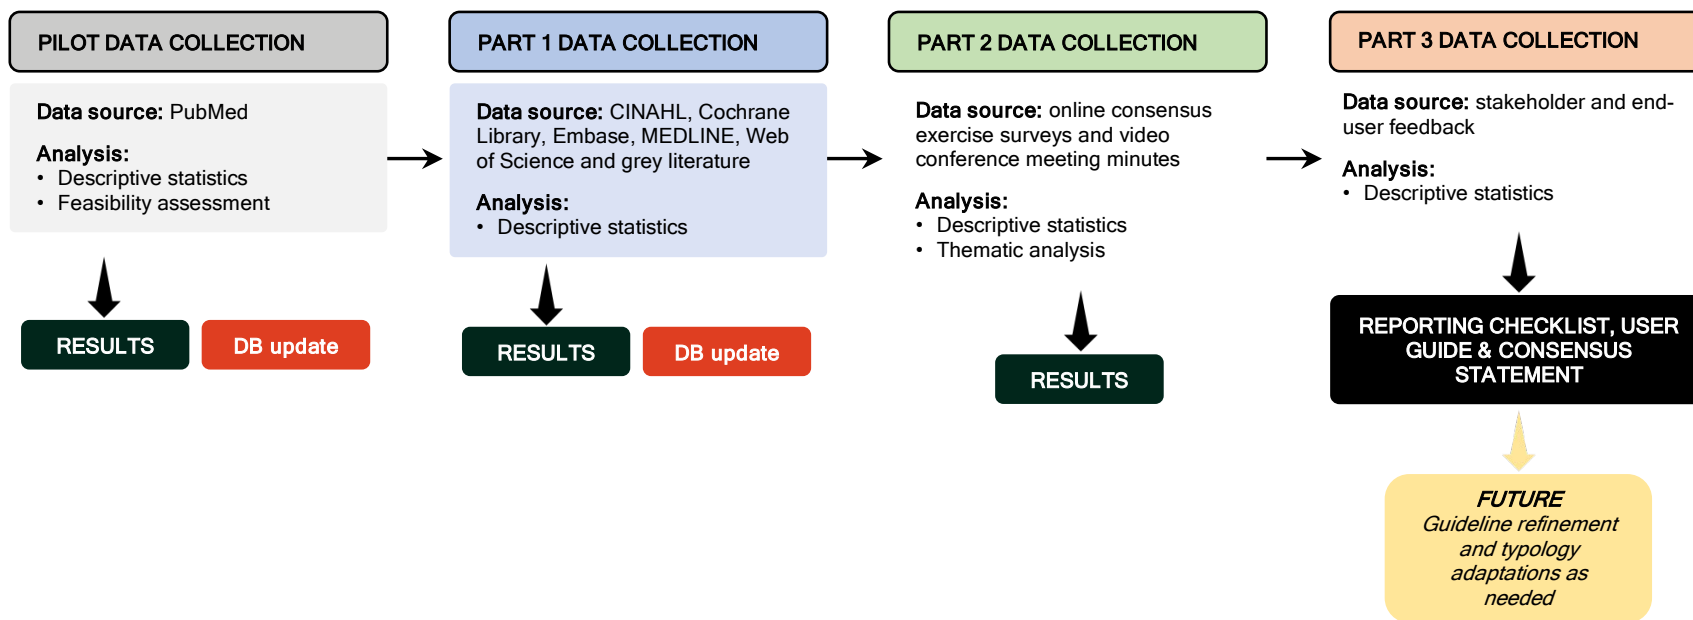

CINAHL: Cumulative Index for Nursing and Allied Health Literature, DB: database ([www.methodsresearch.ca](http://www.methodsresearch.ca))

### Sample search strategy for MEDLINE:

#### *Concept: names of methodological studies*

- 1 (meta-epidemiolog\* OR metaepidemiolog\* OR meta-research OR methodolog\* analysis OR methodolog\* evidence OR methodolog\* investigation OR methodolog\* literature OR methodolog\* overview OR methodolog\* report\* OR methodolog\* review OR methodolog\* survey OR methodolog\* synthesis OR method\* overview OR systematic database review OR systematic literature survey OR systematic survey).mp.
- 2 (methodolog\* study OR method\* review OR method\* survey)

#### *Concept: topics in methodological research (i.e. analysis, design and reporting)*

- 3 exp Data Collection/
- 4 exp Data Interpretation, Statistical/
- 5 exp Epidemiologic Research Design/
- 6 exp Nursing Methodology Research/
- 7 exp Reproducibility of Results/
- 8 exp Research Design/
- 9 3 OR 4 OR 5 OR 6 OR 7 OR 8
- 10 2 AND 9

#### *Concept: methodological studies that are called 'systematic reviews'*

- 11 systematic review.mp.
- 12 Cochrane Database of Systematic Reviews.jn
- 13 11 NOT 12
- 14 \*Data Collection/
- 15 \*Data Interpretation, Statistical/
- 16 \*Epidemiologic Research Design/
- 17 \*Nursing Methodology Research/
- 18 \*Reproducibility of Results/
- 19 \*Research Design/
- 20 14 OR 15 OR 16 OR 17 OR 18 OR 19
- 21 13 AND 20
- 22 1 OR 10 OR 21

# BMJ Open

## Reporting of methodological studies in health research: a protocol for the development of the Methodological Study reporting Checklist (MISTIC)

|                               |                                                                                                                                                                                                                                                                                                                                                                                                                                                                                                                                                                                                                                                                                                                                                                                                                                                                                                                                                                                                                                                                                                                                                                                                                                                                                                                                                                                                                                                                                                                                                                                                                                                                                                                                                                                                                                                                                                                                                                                                                                                                                                                                                                                                                                                                                                                                                                                                                                                         |
|-------------------------------|---------------------------------------------------------------------------------------------------------------------------------------------------------------------------------------------------------------------------------------------------------------------------------------------------------------------------------------------------------------------------------------------------------------------------------------------------------------------------------------------------------------------------------------------------------------------------------------------------------------------------------------------------------------------------------------------------------------------------------------------------------------------------------------------------------------------------------------------------------------------------------------------------------------------------------------------------------------------------------------------------------------------------------------------------------------------------------------------------------------------------------------------------------------------------------------------------------------------------------------------------------------------------------------------------------------------------------------------------------------------------------------------------------------------------------------------------------------------------------------------------------------------------------------------------------------------------------------------------------------------------------------------------------------------------------------------------------------------------------------------------------------------------------------------------------------------------------------------------------------------------------------------------------------------------------------------------------------------------------------------------------------------------------------------------------------------------------------------------------------------------------------------------------------------------------------------------------------------------------------------------------------------------------------------------------------------------------------------------------------------------------------------------------------------------------------------------------|
| Journal:                      | <i>BMJ Open</i>                                                                                                                                                                                                                                                                                                                                                                                                                                                                                                                                                                                                                                                                                                                                                                                                                                                                                                                                                                                                                                                                                                                                                                                                                                                                                                                                                                                                                                                                                                                                                                                                                                                                                                                                                                                                                                                                                                                                                                                                                                                                                                                                                                                                                                                                                                                                                                                                                                         |
| Manuscript ID                 | bmjopen-2020-040478.R1                                                                                                                                                                                                                                                                                                                                                                                                                                                                                                                                                                                                                                                                                                                                                                                                                                                                                                                                                                                                                                                                                                                                                                                                                                                                                                                                                                                                                                                                                                                                                                                                                                                                                                                                                                                                                                                                                                                                                                                                                                                                                                                                                                                                                                                                                                                                                                                                                                  |
| Article Type:                 | Protocol                                                                                                                                                                                                                                                                                                                                                                                                                                                                                                                                                                                                                                                                                                                                                                                                                                                                                                                                                                                                                                                                                                                                                                                                                                                                                                                                                                                                                                                                                                                                                                                                                                                                                                                                                                                                                                                                                                                                                                                                                                                                                                                                                                                                                                                                                                                                                                                                                                                |
| Date Submitted by the Author: | 05-Nov-2020                                                                                                                                                                                                                                                                                                                                                                                                                                                                                                                                                                                                                                                                                                                                                                                                                                                                                                                                                                                                                                                                                                                                                                                                                                                                                                                                                                                                                                                                                                                                                                                                                                                                                                                                                                                                                                                                                                                                                                                                                                                                                                                                                                                                                                                                                                                                                                                                                                             |
| Complete List of Authors:     | <p>Lawson, Daeria; McMaster University, Department of Health Research Methods, Evidence, and Impact</p> <p>Puljak, Livia ; Croatian Catholic University, Center for Evidence-Based Medicine and Health Care</p> <p>Pieper, Dawid; University of Witten/Herdecke, Institute for Research in Operative Medicine</p> <p>Schandelmaier, Stefan; McMaster University, Department of Health Research Methods, Evidence, and Impact; University and University Hospital of Basel, Institute for Clinical Epidemiology and Biostatistics, Department of Clinical Research</p> <p>Collins, Gary; University of Oxford, Centre for Statistics in Medicine</p> <p>Brignardello-Petersen, Romina ; McMaster University, Department of Health Research Methods, Evidence, and Impact</p> <p>Moher, David; Ottawa Hospital Research Institute, Centre for Journalology, Clinical Epidemiology Program; University of Ottawa, School of Epidemiology and Public Health, Faculty of Medicine</p> <p>Tugwell, Peter; University of Ottawa, Department of Medicine and School of Epidemiology and Public Health, Faculty of Medicine; Bruyère Research Institute</p> <p>Welch, Vivian A.; University of Ottawa, School of Epidemiology and Public Health, Faculty of Medicine; Bruyère Research Institute</p> <p>Samaan, Zainab; McMaster University, Department of Health Research Methods, Evidence, and Impact</p> <p>Thombs, Brett; McGill University, Faculty of Medicine; Jewish General Hospital, Lady Davis Institute for Medical Research</p> <p>Nørskov, Anders; Copenhagen University Hospital, Copenhagen Trial Unit</p> <p>Jakobsen, Janus; Copenhagen University Hospital, Copenhagen Trial Unit; University of Southern Denmark, Department of Regional Health Research, The Faculty of Health Sciences</p> <p>Allison, David; Indiana University Bloomington School of Public Health, Department of Epidemiology and Biostatistics</p> <p>Mayo-Wilson, Evan; Indiana University Bloomington School of Public Health, Department of Epidemiology and Biostatistics</p> <p>Young, Taryn; Stellenbosch University, Centre for Evidence-based Health Care, Faculty of Medicine and Health Sciences</p> <p>Chan, An-Wen; University of Toronto, Department of Medicine, Women's College Research Institute</p> <p>Briel, Matthias; McMaster University, Department of Health Research Methods, Evidence, and Impact; University and University Hospital of</p> |

|                                  |                                                                                                                                                                                                                                                                                                                                                                                                                                                                                                                                                                                                                                                                                                      |
|----------------------------------|------------------------------------------------------------------------------------------------------------------------------------------------------------------------------------------------------------------------------------------------------------------------------------------------------------------------------------------------------------------------------------------------------------------------------------------------------------------------------------------------------------------------------------------------------------------------------------------------------------------------------------------------------------------------------------------------------|
|                                  | Basel, Institute for Clinical Epidemiology and Biostatistics, Department of Clinical Research<br>Guyatt, Gordon; McMaster University, Department of Health Research Methods, Evidence, and Impact<br>Thabane, Lehana ; McMaster University, Department of Health Research Methods, Evidence, and Impact, and Department of Paediatrics and Anaesthesia; Saint Joseph's Healthcare Hamilton, Biostatistics Unit, Father Sean O'Sullivan Research Centre and Centre for Evaluation of Medicine<br>Mbuagbaw, Lawrence; McMaster University, Department of Health Research Methods, Evidence, and Impact; Saint Joseph's Healthcare Hamilton, Biostatistics Unit, Father Sean O'Sullivan Research Centre |
| <b>Primary Subject Heading</b> : | Research methods                                                                                                                                                                                                                                                                                                                                                                                                                                                                                                                                                                                                                                                                                     |
| Secondary Subject Heading:       | Epidemiology, Evidence based practice, Medical publishing and peer review                                                                                                                                                                                                                                                                                                                                                                                                                                                                                                                                                                                                                            |
| Keywords:                        | STATISTICS & RESEARCH METHODS, EPIDEMIOLOGY, EDUCATION & TRAINING (see Medical Education & Training)                                                                                                                                                                                                                                                                                                                                                                                                                                                                                                                                                                                                 |
|                                  |                                                                                                                                                                                                                                                                                                                                                                                                                                                                                                                                                                                                                                                                                                      |

SCHOLARONE™  
Manuscripts



I, the Submitting Author has the right to grant and does grant on behalf of all authors of the Work (as defined in the below author licence), an exclusive licence and/or a non-exclusive licence for contributions from authors who are: i) UK Crown employees; ii) where BMJ has agreed a CC-BY licence shall apply, and/or iii) in accordance with the terms applicable for US Federal Government officers or employees acting as part of their official duties; on a worldwide, perpetual, irrevocable, royalty-free basis to BMJ Publishing Group Ltd ("BMJ") its licensees and where the relevant Journal is co-owned by BMJ to the co-owners of the Journal, to publish the Work in this journal and any other BMJ products and to exploit all rights, as set out in our [licence](#).

The Submitting Author accepts and understands that any supply made under these terms is made by BMJ to the Submitting Author unless you are acting as an employee on behalf of your employer or a postgraduate student of an affiliated institution which is paying any applicable article publishing charge ("APC") for Open Access articles. Where the Submitting Author wishes to make the Work available on an Open Access basis (and intends to pay the relevant APC), the terms of reuse of such Open Access shall be governed by a Creative Commons licence – details of these licences and which [Creative Commons](#) licence will apply to this Work are set out in our licence referred to above.

Other than as permitted in any relevant BMJ Author's Self Archiving Policies, I confirm this Work has not been accepted for publication elsewhere, is not being considered for publication elsewhere and does not duplicate material already published. I confirm all authors consent to publication of this Work and authorise the granting of this licence.



1  
2  
3 **1 Reporting of methodological studies in health research: a protocol for the development of**  
4 **the Methodological Study reporTIng Checklist (MISTIC)**  
5

6  
7  
8 3 Daeria O. Lawson<sup>1,\*</sup>, Livia Puljak<sup>2</sup>, Dawid Pieper<sup>3</sup>, Stefan Schandelmaier<sup>1,4</sup>, Gary S. Collins<sup>5</sup>,  
9  
10 4 Romina Brignardello-Petersen<sup>1</sup>, David Moher<sup>6,7</sup>, Peter Tugwell<sup>7,8,9</sup>, Vivian Welch<sup>7,8</sup>, Zainab  
11  
12 5 Samaan<sup>1</sup>, Brett D. Thombs<sup>10,11</sup>, Anders K. Nørskov<sup>12</sup>, Janus C. Jakobsen<sup>12,13</sup>, David B. Allison<sup>14</sup>,  
13  
14 6 Evan Mayo-Wilson<sup>14</sup>, Taryn Young<sup>15</sup>, An-Wen Chan<sup>16</sup>, Matthias Briel<sup>1,4</sup>, Gordon Guyatt<sup>1</sup>,  
15  
16 7 Lehana Thabane<sup>1,17,18,19,20</sup>, Lawrence Mbuagbaw<sup>1,17</sup>  
17  
18

19  
20  
21 9 <sup>1</sup> Department of Health Research Methods, Evidence, and Impact, McMaster University,  
22  
23 Hamilton, ON, Canada  
24  
25

26 11 <sup>2</sup> Center for Evidence-Based Medicine and Health Care, Catholic University of Croatia, Zagreb,  
27  
28 Croatia  
29

30  
31 13 <sup>3</sup> Institute for Research in Operative Medicine, Witten/Herdecke University, Cologne, Germany  
32

33 14 <sup>4</sup> Institute for Clinical Epidemiology and Biostatistics, Department of Clinical Research,  
34  
35 University and University Hospital of Basel, Basel, Switzerland  
36

37  
38 16 <sup>5</sup> Centre for Statistics in Medicine, Nuffield Department of Orthopaedics, Rheumatology and  
39  
40 Musculoskeletal Sciences, University of Oxford, Oxford, United Kingdom  
41

42 18 <sup>6</sup> Centre for Journalology, Clinical Epidemiology Program, Ottawa Hospital Research Institute,  
43  
44 Ottawa, ON, Canada  
45

46  
47 20 <sup>7</sup> School of Epidemiology and Public Health, Faculty of Medicine, University of Ottawa,  
48  
49 Ottawa, ON, Canada  
50

51 22 <sup>8</sup> Bruyère Research Institute, Ottawa, ON, Canada  
52

53  
54 23 <sup>9</sup> Department of Medicine, University of Ottawa, Ottawa, ON, Canada  
55  
56  
57  
58

- 1  
2  
3 24 <sup>10</sup> Faculty of Medicine, McGill University, Montreal, QC, Canada  
4  
5 25 <sup>11</sup> Lady Davis Institute for Medical Research, Jewish General Hospital, Montreal, QC, Canada  
6  
7 26 <sup>12</sup> Copenhagen Trial Unit, Copenhagen University Hospital, Rigshospitalet, Copenhagen,  
8  
9 Denmark  
10  
11  
12 28 <sup>13</sup> Department of Regional Health Research, The Faculty of Health Sciences, University of  
13  
14 Southern Denmark, Odense, Denmark  
15  
16  
17 30 <sup>14</sup> Department of Epidemiology and Biostatistics, School of Public Health-Bloomington, Indiana  
18  
19 31 University, Bloomington, IN, United States  
20  
21  
22 32 <sup>15</sup> Centre for Evidence-based Health Care, Stellenbosch University, Cape Town, South Africa  
23  
24 33 <sup>16</sup> Department of Medicine, Women's College Research Institute, University of Toronto,  
25  
26 34 Toronto, ON, Canada  
27  
28 35 <sup>17</sup> Biostatistics Unit, Father Sean O'Sullivan Research Centre, St. Joseph's Healthcare Hamilton,  
29  
30 Hamilton, ON, Canada  
31  
32  
33 37 <sup>18</sup> Departments of Paediatrics and Anaesthesia, McMaster University, Hamilton, ON, Canada  
34  
35 38 <sup>19</sup> Centre for Evaluation of Medicine, St. Joseph's Healthcare Hamilton Hamilton, ON, Canada  
36  
37  
38 39 <sup>20</sup> Population Health Research Institute, Hamilton Health Sciences, Hamilton, ON, Canada  
39  
40  
41

42 **\*Correspondence:** Daeria O. Lawson, Department of Health Research Methods, Evidence, and  
43  
44 Impact, Faculty of Health Sciences, McMaster University, 1280 Main Street West, Hamilton,  
45  
46 ON L8S 4K1, E-mail: [lawsod3@mcmaster.ca](mailto:lawsod3@mcmaster.ca)  
47  
48  
49  
50

51 **Word count:** 3823  
52  
53  
54  
55  
56  
57  
58  
59  
60

1  
2  
3 46 **ABSTRACT**  
4

5 47 **Introduction:** Methodological studies (i.e. studies that evaluate the design, conduct, analysis or  
6  
7 48 reporting of other studies in health research) address various facets of health research including,  
8  
9  
10 49 for instance, data collection techniques, differences in approaches to analyses, reporting quality,  
11  
12 50 adherence to guidelines, or publication bias. As a result, methodological studies can help to  
13  
14 51 identify knowledge gaps in the methodology of health research, and strategies for improvement  
15  
16 52 in research practices. Differences in methodological study names and a lack of reporting  
17  
18 53 guidance contribute to lack of comparability across studies, and difficulties in identifying  
19  
20 54 relevant previous methodological studies. This paper outlines the methods we will use to develop  
21  
22 55 an evidence-based tool—the Methodological Study reporting Checklist (MISTIC)—to  
23  
24 56 harmonize naming conventions and improve the reporting of methodological studies.  
25  
26  
27

28 57 **Methods and analysis:** We will search for methodological studies in the Cumulative Index to  
29  
30 58 Nursing and Allied Health Literature, Cochrane Library, Embase, MEDLINE, Web of Science,  
31  
32 59 check reference lists, and contact experts in the field. We will extract and summarize data on the  
33  
34 60 study names, design, and reporting features of the included methodological studies. Consensus  
35  
36 61 on study terms and recommended reporting items will be achieved via video conference  
37  
38 62 meetings with a panel of experts including researchers who have published methodological  
39  
40 63 studies.  
41  
42  
43

44 64 **Ethics and dissemination:** The consensus study has been exempt from ethics review by the  
45  
46 65 Hamilton Integrated Research Ethics Board. The results of the review and the reporting guideline  
47  
48 66 will be disseminated in stakeholder meetings, conferences, peer-reviewed publications, in  
49  
50 67 requests to journal editors (to endorse or make the guideline a requirement for authors), and on  
51  
52 68 the EQUATOR Network and reporting guideline websites.  
53  
54  
55  
56  
57  
58

1  
2  
3 69 **Registration:** We have registered the development of the reporting guideline with the  
4  
5 70 EQUATOR Network, and publicly posted this project on the Open Science Framework  
6  
7  
8 71 ([www.osf.io/9hgbq](http://www.osf.io/9hgbq)).  
9  
10  
11  
12  
13  
14  
15  
16  
17  
18  
19  
20  
21  
22  
23  
24  
25  
26  
27  
28  
29  
30  
31  
32  
33  
34  
35  
36  
37  
38  
39  
40  
41  
42  
43  
44  
45  
46  
47  
48  
49  
50  
51  
52  
53  
54  
55  
56  
57  
58  
59  
60

For peer review only

1  
2  
3 72 **STRENGTHS AND LIMITATIONS OF THIS STUDY**  
4

- 5 73 • To the best of our knowledge, this is the first study to design an evidence-based tool to  
6  
7 support the complete and transparent reporting of methodological studies in health research.  
8 74  
9  
10 75 • This project will help to highlight the current reporting practices of authors of  
11  
12 methodological studies to outline a list of key reporting items.  
13 76  
14  
15 77 • The stakeholders recruited for the consensus study will represent a diverse group of expert  
16  
17 health research methodologists including biostatisticians, clinical researchers, journal  
18 78  
19 editors, healthcare providers, and reporting guideline developers.  
20 79  
21  
22 80 • Our study does not incorporate a blinded consensus process and this may impact the flow of  
23  
24 discussions during the conference meetings.  
25 81  
26  
27  
28  
29  
30  
31  
32  
33  
34  
35  
36  
37  
38  
39  
40  
41  
42  
43  
44  
45  
46  
47  
48  
49  
50  
51  
52  
53  
54  
55  
56  
57  
58  
59  
60

## 82 INTRODUCTION

83 Concerns with the quality and quantity of research have sparked interest in the rapidly  
84 evolving field which has been called meta-epidemiology, meta-research, or research-on-research  
85 [1-3]. This field of research addresses the entire research process, from question development to  
86 design, conduct and reporting issues, and most often uses research-related reports (e.g. protocols,  
87 published manuscripts, registry entries, conference abstracts) as the unit of analysis. These  
88 studies may seek to “(1) describe the distribution of research evidence for a specific question; (2)  
89 examine heterogeneity and associated risk factors; and (3) control bias across studies and  
90 summarize research evidence as appropriate” [4]. For the purpose of this project, we will refer to  
91 these research outputs as “methodological studies”, i.e. studies that evaluate the design, conduct,  
92 analysis (e.g. including bias, statistical plan and methods), or reporting of other studies in health  
93 research. This definition does not include statistical methodological studies (e.g. studies testing  
94 new algorithms or analytical methods, simulation studies), and experimental studies in which the  
95 unit of analysis is not a research report. Methodological studies are important because they can  
96 identify gaps, biases, and inefficiencies in research practices, and propose improvements and  
97 solutions.

98 A PubMed search performed in April 2020 for terms often used to describe  
99 methodological studies suggests that the rate of publication of methodological studies has  
100 increased over time, illustrated in Figure 1.

101 — Figure 1. Trends in methodological studies indexed in PubMed from 2009 to 2019. —

102 In the past 20 years, methodological studies have influenced the conduct of health research by  
103 informing many popular practices such as double data extraction in systematic reviews [5];  
104 optimal approaches to conducting subgroup analyses [6]; and reporting of randomized trials,

1  
2  
3 105 observational studies, pilot studies, and systematic reviews [7-10] to name a few.  
4  
5 106 Methodological studies have played an important role in ensuring that health research is reliable,  
6  
7 107 valid, transparent and replicable. These types of studies may investigate: bias in research [11,  
8  
9 108 12], quality or completeness of reporting [13, 14], consistency of reporting [15], methods used  
10  
11 109 [16], factors associated with reporting practices [17]; and may provide summaries of other  
12  
13 110 methodological studies [18], and other issues. Methodological studies may also be used to  
14  
15 111 evaluate the uptake of methods over time to investigate whether (and where) practices are  
16  
17 112 improving and allow researchers to make comparisons across different medical areas [19, 20].  
18  
19 113 These studies can also highlight methodological strengths and shortcomings such as sample size  
20  
21 114 calculations in randomized controlled trials [21, 22], quality of clinical prediction models [23],  
22  
23 115 and spin and over-interpretation of study findings [24-26]. As such, methodological studies  
24  
25 116 promote robust, evidence-based science and help to discard inefficient research practices [27]. A  
26  
27 117 draft conceptual framework of the various categories of methodological studies that we have  
28  
29 118 observed is outlined in Figure 2. Broadly, some categories of methodological studies include  
30  
31 119 those investigating: bias and spin, methodological approaches to study design, or reporting  
32  
33 120 issues.

34  
35  
36  
37  
38  
39  
40 121 — Figure 2. Draft conceptual framework of categories of methodological studies. —

41  
42 122 Despite the importance of methodological studies, there is no guidance for their  
43  
44 123 reporting. Murad and Wang have suggested a modification to the Preferred Reporting Items for  
45  
46 124 Systematic Reviews and Meta-Analyses (PRISMA), a widely used reporting tool that is  
47  
48 125 sometimes used for methodological studies because these studies often use methods that are also  
49  
50 126 used in systematic reviews [28]. Although a modification of PRISMA may work well for the  
51  
52 127 data collection components of some methodological studies, it would fail to appropriately  
53  
54  
55  
56  
57  
58  
59  
60

1  
2  
3 128 address the many different types of research questions that methodological studies attempt to  
4  
5 129 answer. For example, if researchers were interested in changes in reporting quality of trials since  
6  
7  
8 130 the publication of the CONSORT guidelines, they could use an interrupted time-series design.  
9  
10 131 Also, methodological studies that include a random sample of research reports [29], or those  
11  
12 132 structured as before-after designs [19] would be a poor fit for the modified PRISMA tool, which  
13  
14 133 is best suited for studies designed in the style of systematic reviews. Likewise, studies in which  
15  
16 134 the unit of analysis is not the “study” require more specific guidance (e.g. when investigating  
17  
18 135 multiple subgroup analyses or multiple outcomes within the same study) [30]. Thus, guidelines  
19  
20 136 for transparent reporting of methodological studies are needed, and this need is widely  
21  
22  
23 137 acknowledged in the scientific community [31, 32]

24  
25  
26 138 Our work will address two main concerns:

- 27  
28 139 1. There are no globally accepted names for methodological studies, making them difficult to  
29  
30 140 identify. Methodological studies have been called ‘methodological review’, ‘systematic  
31  
32 141 review’, ‘systematic survey’, ‘literature review’, ‘meta-epidemiological study’ and many  
33  
34 142 other names. The diversity in names compromises training and educational activities [33], and  
35  
36 143 it makes it difficult for end-users (e.g. clinical researchers, guideline developers) to search for,  
37  
38 144 identify and use these studies [34, 35].  
39  
40  
41 145 2. The reporting of methodological studies is inconsistent, which may relate to differences in  
42  
43 146 objectives, and to differences in transparency and completeness. That is, some studies may be  
44  
45 147 better reported than others. While the most appropriate approach to reporting will depend on  
46  
47 148 the research question, explicit, user-friendly, and consensus-based guidance is needed to  
48  
49 149 ensure that methodological studies are reported transparently and comprehensively [36].  
50  
51  
52

53  
54 150 ***Aims***  
55  
56  
57  
58  
59  
60



1  
2  
3 151 The aims of this study protocol are to outline the procedures to define and harmonize the names  
4  
5 152 describing methodological studies, and to develop reporting guidelines for methodological  
6  
7  
8 153 studies in human health research.  
9

10 154

## 11 12 155 **METHODS AND ANALYSIS**

### 13 14 15 156 *Study design*

16  
17 157 We have adopted the strategy for the development of reporting guidelines proposed by Moher et  
18  
19 158 al. [37]. A visual overview of this approach, highlighting key components of the process, is  
20  
21 159 presented in Figure 3. The three parts of the project which will be addressed using the above  
22  
23  
24 160 strategy are outlined in detail below (see Supplementary File for an outline of the data flow  
25  
26 161 informing subsequent parts of the project).

27  
28 162 — Figure 3. Project overview for the development of reporting guidelines for methodological  
29  
30  
31 163 studies in health research. —

32  
33 164

### 34 35 165 **Part 1: Methodological Review**

36  
37 166 The objectives of this part are to: a) identify names used to describe methodological studies, b)  
38  
39 167 identify the various designs, analysis and reporting features of methodological studies, c) find  
40  
41  
42 168 any previous reporting guidance, and d) identify methodological study experts.

### 43 44 45 169 *Search strategy*

46  
47 170 We developed a search strategy informed by our pilot work [38] targeting health-related sciences  
48  
49 171 and biomedicine databases: Cumulative Index to Nursing and Allied Health Literature  
50  
51 172 (CINAHL), Cochrane Library, Excerpta Medica (Embase), MEDLINE, and Web of Science.  
52  
53  
54 173 There will be no limits by publication year, type or language. We will perform searches for  
55  
56  
57  
58  
59

1  
2  
3 174 authors known to publish in this field, check reference lists of relevant studies, check existing  
4  
5 175 methodological study repositories (Studies Within a Trial [SWATs] and Studies Within a  
6  
7 176 Review [SWARs]), preprints (bioRxiv and medRxiv), setup Google Alerts for key words (e.g.  
8  
9 177 meta-epidemiology, research-on-research), and contact experts (e.g. via email, meetings,  
10  
11 178 following relevant journals, subscribing to methods email newsletters including the Methods in  
12  
13 179 Research on Research [MiRoR] and the National Institute for Health and Care Excellence  
14  
15 180 [NICE] groups, and following researchers on social media platforms such as ResearchGate and  
16  
17 181 Twitter) to identify additional methodological studies. We will also check the EQUATOR library  
18  
19 182 to identify any published or under development reporting guidance. These approaches are  
20  
21 183 informed by previous work and published literature [35, 38]. Two health sciences librarians at  
22  
23 184 the Health Sciences Library (McMaster University) were consulted and reviewed the final search  
24  
25 185 strategy (see Supplementary File) in line with the Peer Review of Electronic Search Strategies  
26  
27 186 (PRESS) framework [39].  
28  
29  
30  
31  
32

### 33 187 *Eligible studies*

34  
35 188 Studies that investigate methods—design, conduct, analysis, or reporting—in other studies of  
36  
37 189 health research in humans will be eligible. The ‘other studies’ (or research reports) refers to the  
38  
39 190 unit of analysis of the methodological studies (e.g. abstracts, cohort studies, randomized trials,  
40  
41 191 registry records, study protocols, systematic reviews). Only published protocols and final reports  
42  
43 192 of studies that investigate methods will be eligible. We will exclude simulation studies, studies  
44  
45 193 testing new statistical methods (i.e. there is no specific unit of analysis) and experimental studies  
46  
47 194 of methods (i.e. the unit of analysis is not a research report). These sorts of studies either already  
48  
49 195 have reporting guidelines or can be reported in a commentary-style format.  
50  
51  
52  
53

### 54 196 *Screening*

197 A team of reviewers led by DOL will screen titles and abstracts independently, in duplicate in  
 198 *Rayyan* [40], and full-texts in standardized forms in *DistillerSR* [41]. Both are online  
 199 collaborative platforms for screening and reviewing literature. We will measure agreement on  
 200 screening and study inclusion using Cohen's Kappa statistic [42, 43]. Any discrepancies between  
 201 reviewers will be resolved through discussion.

### 202 **Data extraction**

203 In order to document the current reporting practices we will extract data from included studies  
 204 independently, in duplicate based on a standardized data collection form. Key data extraction  
 205 fields for documenting methodological study features and reporting practices (e.g. study design  
 206 name, databases search, any guideline use) are outlined in Table 1. All data will be compiled in  
 207 *DistillerSR*. Any discrepancies between reviewers will be resolved through discussion.

208 **Table 1.** Overview of data extraction fields for the review.

| Section       | Data to be collected                                                                                                                                                                                                                                                                                                                                                                                                                                                                                                                     |
|---------------|------------------------------------------------------------------------------------------------------------------------------------------------------------------------------------------------------------------------------------------------------------------------------------------------------------------------------------------------------------------------------------------------------------------------------------------------------------------------------------------------------------------------------------------|
| Bibliometrics | <ul style="list-style-type: none"> <li>• Corresponding or last author (first and last name) and contact information (email address). We will first verify whether the corresponding author has academic faculty status, and if not, we will contact the last author</li> <li>• Country of author</li> <li>• Publication year</li> <li>• Study design name in title (verbatim quotation/descriptor)</li> <li>• Type of article (protocol or final publication, and letter/brief report or full publication)</li> <li>• Journal</li> </ul> |
| Methods       | <ul style="list-style-type: none"> <li>• Study design name in methods section (verbatim quotation/descriptor)</li> <li>• Objectives (verbatim quotation)</li> </ul>                                                                                                                                                                                                                                                                                                                                                                      |

|            |                                                                                                                                                                                                                                                                                                                                                                                                                                                                                                                                                                                                                                                                                      |
|------------|--------------------------------------------------------------------------------------------------------------------------------------------------------------------------------------------------------------------------------------------------------------------------------------------------------------------------------------------------------------------------------------------------------------------------------------------------------------------------------------------------------------------------------------------------------------------------------------------------------------------------------------------------------------------------------------|
|            | <ul style="list-style-type: none"> <li>• Outcomes (verbatim quotation)</li> <li>• Search strategy reported (yes/no)</li> <li>• Search time limits and justifications (yes/no and verbatim quotation)</li> <li>• Databases searched</li> <li>• Included research report types (e.g. randomized trials, systematic reviews, cohort studies)</li> <li>• Sampling method (where applicable)</li> <li>• Analysis type (e.g. correlation, descriptive, regression, time-series)</li> <li>• Reporting guidance used and justification (yes/no, name and verbatim quotation)</li> <li>• Prospective registration and existence of a published protocol (yes/no, where applicable)</li> </ul> |
| Results    | <ul style="list-style-type: none"> <li>• Presence of flow diagrams (yes/no)</li> <li>• Total records screened and included</li> <li>• Type of final synthesis performed (qualitative, quantitative, both)</li> </ul>                                                                                                                                                                                                                                                                                                                                                                                                                                                                 |
| Discussion | <ul style="list-style-type: none"> <li>• Intended use of findings (verbatim quotation)</li> <li>• Limitations (verbatim quotation)</li> </ul>                                                                                                                                                                                                                                                                                                                                                                                                                                                                                                                                        |
| Other      | <ul style="list-style-type: none"> <li>• Conflicts of interest (yes/no)</li> <li>• Funding type (e.g. industry, institutional, non-profit)</li> <li>• Provide access to data (yes/no)</li> </ul>                                                                                                                                                                                                                                                                                                                                                                                                                                                                                     |

209

210 All reviewers will undergo calibration exercises and pilot the screening and data  
 211 collection forms (25 studies per reviewer). We will incorporate an emergent design in the data  
 212 collection stage of the review, which is characterized by a flexibility in the methodology,  
 213 allowing researchers to remain open to modifications [44]. Should any new information that is of

1  
2  
3 214 interest arise during the full-text screen or data extraction, we will update the data collection  
4  
5 215 form and collect this information for all studies retrospectively and going forward. Any  
6  
7 216 modifications to the present protocol will be reported in the final published review. This iterative  
8  
9 217 approach will allow for the capture of information as new methodological study design features  
10  
11 218 come to light during the full-text screening and data extraction phases. Based on this approach,  
12  
13 219 data extraction will be updated accordingly for previously reviewed studies as needed. For  
14  
15 220 example, we expect to see overlaps in methodological study names, some of which might be  
16  
17 221 attributed to collaborating research groups. There also appear to be similarities in methodological  
18  
19 222 study reporting styles that are borrowed from systematic review [4] or survey study designs,  
20  
21 223 which have both been extensively developed and are omnipresent in health research literature.  
22  
23 224 However, if the current data collection fields, listed in Table 1, are insufficient to capture the  
24  
25 225 nuances of the varieties of methodological studies, we will revise our data collection forms  
26  
27 226 accordingly and collect the data for all studies.  
28  
29  
30  
31  
32

### 33 227 ***Generation of a list of candidate items***

34  
35 228 The generation of a list of candidate items will be informed by two sources. First, a list of  
36  
37 229 reporting items will be compiled based on what has been reported by authors of the included  
38  
39 230 studies in the methodological review (e.g. flow diagram, search strategy). We will also note the  
40  
41 231 use of any reporting guidance as mentioned by authors (e.g. PRISMA, STrengthening the  
42  
43 232 Reporting of OBServational studies in Epidemiology [STROBE]). Each item will be ranked from  
44  
45 233 most frequently reported to those less frequently reported. Second, this list will be presented to  
46  
47 234 expert user stakeholders alongside the proportion of methodological studies that report on each  
48  
49 235 item. Stakeholders will be asked to propose additional relevant items to finalize the list of  
50  
51 236 candidate reporting items for Part 2.  
52  
53  
54  
55  
56  
57  
58  
59  
60

### 237 ***Data analysis***

238 We will present the flow of articles retrieved and screened in a study flow diagram, and  
239 summarize data in tables with explanatory text. We will provide descriptive statistics, i.e. counts  
240 (percentage) for categorical data, and means (standard deviation [SD]) or medians (interquartile  
241 range [IQR]) for continuous data. In addition to study names, we will synthesize and tabulate  
242 verbatim quotations for the study objectives, outcomes, and intended use of findings to provide  
243 context and clarification for methodological study rationales [45]. We will qualitatively group  
244 studies into categories based on similarities in reporting features. All statistical analyses will be  
245 done in *STATA version 15.1* [46]. We will identify additional potential stakeholders from the list  
246 of authors of included studies.

### 248 **Part 2: Consensus Study**

249 This part of the project will consist of consultation with expert user stakeholders in a consensus  
250 study. The objectives are to define methodological studies, and outline the recommended study  
251 name(s) and best reporting practices. The project steering group (DOL, GG, LM, LT), which  
252 includes members with expertise in health research methods, will oversee the consensus study  
253 and development of the reporting guideline.

### 254 ***Identification of stakeholders***

255 The steering group will be responsible for identifying expert user stakeholders based on expertise  
256 with methodological studies and expertise with reporting guideline development [47]. Additional  
257 stakeholders will be identified from the list of authors (either corresponding or senior, with  
258 academic faculty-status) of methodological studies from the review. In our selection of  
259 stakeholders, we will seek individuals who will be committed to participating and providing

260 feedback for the reporting guideline. We define expert user stakeholders as researchers involved  
 261 in the design, conduct, analysis, interpretation, or dissemination of methodological studies.  
 262 Approximately 20-30 stakeholders will be selected (including the protocol authors) as  
 263 participants in the consensus exercises. We will track response rates to invitations to participate  
 264 in the consensus study. We will collect participant demographics (e.g. country, primary job title,  
 265 academic rank, and methodological study publication history) to provide insight into the  
 266 representation in this field of research based on sociocultural factors.

### 267 ***Measuring agreement and achieving consensus***

268 The above definition of methodological studies (i.e. studies that evaluate the design, conduct,  
 269 analysis, or reporting of other studies in health research) will be used during the online consensus  
 270 exercises and video conference meetings. Participants will discuss the following: a) names for  
 271 methodological studies, b) categories of methodological studies, and c) reporting requirements.  
 272 These three components, outlined in Table 2, will be completed electronically through a  
 273 McMaster Ethics Compliant service, *LimeSurvey* (<https://reo.mcmaster.ca/limesurvey>) for online  
 274 surveys [48].

275 **Table 2.** Overview of consensus study activities and expected outputs.

| Stage                                                            | Description of activities to be completed                                                                                                                                                                                                                                                                                                   | Expected outputs                                                                                              |
|------------------------------------------------------------------|---------------------------------------------------------------------------------------------------------------------------------------------------------------------------------------------------------------------------------------------------------------------------------------------------------------------------------------------|---------------------------------------------------------------------------------------------------------------|
| Online consensus exercise: categories of methodological studies* | <ul style="list-style-type: none"> <li>We will present the <b>proposed categories of methodological studies</b> (i.e. based on the aim, design, sampling strategy and unit of analysis) with rationale for each. For each category (e.g. methodological studies that evaluate study design; methodological studies that evaluate</li> </ul> | <ul style="list-style-type: none"> <li>List of ‘appropriate’ categories for methodological studies</li> </ul> |

1  
2  
3 reporting practices) an example of studies  
4 that belong in each category will also be  
5 presented. An example of potential  
6 categories are outlined in Figure 2.

- 7  
8  
9  
10  
11  
12 • Participants will be asked to rate and  
13 comment on the appropriateness of each  
14 category on a 3-point ordinal scale: 3-  
15 appropriate; 2- somewhat appropriate; 1-  
16 inappropriate
- 17  
18 • A validity ratio (VR) will be computed as  
19 follows:

$$20 \quad VR = \frac{(Ne - N/2)}{(N/2)} \quad \text{where } Ne \text{ is the number}$$

21  
22  
23  
24  
25  
26  
27  
28  
29  
30  
31  
32  
33  
34  
35  
36  
37  
38  
39  
40  
41  
42  
43  
44  
45  
46  
47  
48  
49  
50  
51  
52  
53  
54  
55  
56  
57  
58  
59  
60  
of participants who indicated that the  
category was appropriate (i.e., a rating of  
“3”) and  $N$  is the total number of  
participants. This ratio will indicate the  
category that at least half of the  
participants consider appropriate. The VR  
will be interpreted based on a table of  
critical values [49]. For example, for 30  
participants ( $N = 30$ ), the critical value is  
0.33 (i.e., at least 20 participants must  
deem the category appropriate). Only  
items based on a critical value greater  
than the set threshold will be considered



|                                                                       |                                                                                                                                                                                                                                                                                                                                                                                                                                                                 |                                                                                                                    |
|-----------------------------------------------------------------------|-----------------------------------------------------------------------------------------------------------------------------------------------------------------------------------------------------------------------------------------------------------------------------------------------------------------------------------------------------------------------------------------------------------------------------------------------------------------|--------------------------------------------------------------------------------------------------------------------|
|                                                                       | <p>further [50]. This approach allows consensus to be achieved remotely, and makes decision-making objective.</p>                                                                                                                                                                                                                                                                                                                                               |                                                                                                                    |
| <p>Online consensus exercise: name(s) for methodological studies*</p> | <ul style="list-style-type: none"> <li>• We will present the <b>names of methodological studies</b> and for each name (i.e. meta-epidemiological study, systematic survey etc.), an example of a study using that name will be provided.</li> <li>• Participants will be asked to rate the appropriateness of each potential name on a 3-point ordinal scale, and VR will be computed:<br/>3- appropriate; 2- somewhat appropriate; 1- inappropriate</li> </ul> | <ul style="list-style-type: none"> <li>• List of ‘appropriate’ names for methodological studies</li> </ul>         |
| <p>Online consensus exercise: reporting items*</p>                    | <ul style="list-style-type: none"> <li>• We will present the <b>proposed reporting items</b> and participants will be asked to rate the usefulness of each item on a 3-point ordinal scale, and VR will be computed:<br/>3- essential; 2- maybe essential; 1- not essential</li> <li>• Participants will be asked to indicate if each reporting item applies to each different methodological study category.</li> </ul>                                        | <ul style="list-style-type: none"> <li>• List of ‘essential’ reporting items for methodological studies</li> </ul> |

|                                                                                                                                                                                                                                                                                                                                                                                                                                                                                                           |                                                                                                                                                                                                                                                                                                                                                                                                                                                                                                                                                                                                                                                                                                                                                                                                                                                                                                                                                                                                                                                                                                |                                                                                                                                                                                                                                                           |
|-----------------------------------------------------------------------------------------------------------------------------------------------------------------------------------------------------------------------------------------------------------------------------------------------------------------------------------------------------------------------------------------------------------------------------------------------------------------------------------------------------------|------------------------------------------------------------------------------------------------------------------------------------------------------------------------------------------------------------------------------------------------------------------------------------------------------------------------------------------------------------------------------------------------------------------------------------------------------------------------------------------------------------------------------------------------------------------------------------------------------------------------------------------------------------------------------------------------------------------------------------------------------------------------------------------------------------------------------------------------------------------------------------------------------------------------------------------------------------------------------------------------------------------------------------------------------------------------------------------------|-----------------------------------------------------------------------------------------------------------------------------------------------------------------------------------------------------------------------------------------------------------|
| <p>1<br/>2<br/>3<br/>4<br/>5<br/>6<br/>7<br/>8<br/>9<br/>10<br/>11<br/>12<br/>13<br/>14<br/>15<br/>16<br/>17<br/>18<br/>19<br/>20<br/>21<br/>22<br/>23<br/>24<br/>25<br/>26<br/>27<br/>28<br/>29<br/>30<br/>31<br/>32<br/>33<br/>34<br/>35<br/>36<br/>37<br/>38<br/>39<br/>40<br/>41<br/>42<br/>43<br/>44<br/>45<br/>46<br/>47<br/>48<br/>49<br/>50<br/>51<br/>52<br/>53<br/>54<br/>55<br/>56<br/>57<br/>58<br/>59<br/>60</p> <p>First video conference meeting (two calls<sup>†</sup>, 2 hours each)</p> | <ul style="list-style-type: none"> <li>• Participants will confirm the appropriate name(s) and categories for methodological studies, and agree on reporting items that should be included or excluded, and discuss the rationales behind their selections. All participants will be required to come to a consensus to include an item.</li> <li>• Meeting minutes and summary of the discussion and decisions will be shared with participants to provide additional feedback after the meeting.</li> <li>• Based on these discussions and decisions, the steering group will develop a <b>first draft of the reporting checklist</b> (e.g. with a checkbox to indicate Yes/Reported, No/Not Reported, and a space to indicate on what page the information is reported).</li> <li>• The checklist will be divided into different reporting sections in a methodological study (e.g. Introduction, Methods, Results, Discussion).</li> <li>• Examples of how to report information for each item will be provided alongside the checklist as part of the <b>draft user guide</b>.</li> </ul> | <ul style="list-style-type: none"> <li>• First drafts of the:             <ol style="list-style-type: none"> <li>a) reporting checklist</li> <li>b) user guide</li> <li>c) recommended methodological study name(s) and categories</li> </ol> </li> </ul> |
|-----------------------------------------------------------------------------------------------------------------------------------------------------------------------------------------------------------------------------------------------------------------------------------------------------------------------------------------------------------------------------------------------------------------------------------------------------------------------------------------------------------|------------------------------------------------------------------------------------------------------------------------------------------------------------------------------------------------------------------------------------------------------------------------------------------------------------------------------------------------------------------------------------------------------------------------------------------------------------------------------------------------------------------------------------------------------------------------------------------------------------------------------------------------------------------------------------------------------------------------------------------------------------------------------------------------------------------------------------------------------------------------------------------------------------------------------------------------------------------------------------------------------------------------------------------------------------------------------------------------|-----------------------------------------------------------------------------------------------------------------------------------------------------------------------------------------------------------------------------------------------------------|

|                                                                         |                                                                                                                                                                                                                                                                                                                                                                                                                                                                                                                                                                                                                                                                                                                                                                                                                                     |                                                                                                                                                                                                                                                 |
|-------------------------------------------------------------------------|-------------------------------------------------------------------------------------------------------------------------------------------------------------------------------------------------------------------------------------------------------------------------------------------------------------------------------------------------------------------------------------------------------------------------------------------------------------------------------------------------------------------------------------------------------------------------------------------------------------------------------------------------------------------------------------------------------------------------------------------------------------------------------------------------------------------------------------|-------------------------------------------------------------------------------------------------------------------------------------------------------------------------------------------------------------------------------------------------|
|                                                                         | This will be shared with participants for comment prior to the next meeting.                                                                                                                                                                                                                                                                                                                                                                                                                                                                                                                                                                                                                                                                                                                                                        |                                                                                                                                                                                                                                                 |
| Second video conference meeting (two calls <sup>†</sup> , 2 hours each) | <ul style="list-style-type: none"> <li>• Participants will agree on a structure and format for the checklist (e.g. general layout including appropriate sectioning such as ‘Title’, ‘Abstract’ and ‘Body’ of reports; a decision tree to delineate the category of the methodological study, core items for each category of methodological study, optional items). The group will also review the examples of reporting to be included in the user guide for each reporting item.</li> <li>• Meeting minutes and summary of the discussion and decisions will be shared with participants to provide additional feedback after the meeting.</li> <li>• Based on these discussions and decisions, the steering group will develop a <b>revised draft of the reporting checklist</b> and an <b>elaborated user guide</b>.</li> </ul> | <ul style="list-style-type: none"> <li>• Revised drafts of the: <ul style="list-style-type: none"> <li>a) reporting checklist</li> <li>b) user guide</li> <li>c) recommended methodological study name(s) and categories</li> </ul> </li> </ul> |
| Final video conference meeting (4 hours)                                | <ul style="list-style-type: none"> <li>• Discussion with participants will focus on confirming rationales for the final selected items, and providing examples for each reporting item to be outlined in the consensus statement and elaboration.</li> </ul>                                                                                                                                                                                                                                                                                                                                                                                                                                                                                                                                                                        | <ul style="list-style-type: none"> <li>• Final documents for the: <ul style="list-style-type: none"> <li>a) reporting checklist</li> <li>b) user guide</li> </ul> </li> </ul>                                                                   |

|                                                                                                                                                                                                                                                        |  |                                                                                                                                                                  |
|--------------------------------------------------------------------------------------------------------------------------------------------------------------------------------------------------------------------------------------------------------|--|------------------------------------------------------------------------------------------------------------------------------------------------------------------|
|                                                                                                                                                                                                                                                        |  | c) recommended<br>methodological study name(s)<br>and categories<br><ul style="list-style-type: none"> <li>• Consensus statement and<br/> elaboration</li> </ul> |
| * During the online exercises, participants can suggest additional categories, names, or items that they wish to discuss during the video conferences.<br>† Two calls will be scheduled to accommodate stakeholders in Eastern and Western time zones. |  |                                                                                                                                                                  |

276

277 All video conferences will be facilitated by two investigators (DOL and LM).

278 Stakeholders will be consulted for the development of drafts, elaborations and explanations for  
279 specific items. All steering committee members and stakeholders will be required to participate  
280 and vote during the consensus meetings. Disagreements will be resolved through discussion, and  
281 if no consensus can be reached, the steering committee will convey the recommendations for the  
282 stakeholder group to approve. *Zoom*, or comparable video conferencing software, will be used to  
283 allow for the collection of recordings [51].

#### 284 ***Data analysis***

285 Findings from the consensus exercise will be summarized descriptively in tables that include  
286 counts (percentage) for categorical data, and means (SD) or medians (IQR) for continuous data.  
287 We will measure the levels of agreement (i.e. percentage increase in agreement for successive  
288 rounds, number of comments made for each successive round, and rounds with emergence of  
289 new themes) and instability (i.e. spread and SD of ranked responses for each item) for each  
290 round [52]. After the online exercises, one investigator (DOL) will qualitatively synthesize and  
291 code the suggestions for the methodological study names, categories and reporting items into  
292 common themes in *Dedoose*, a qualitative research software [53]. The steering committee will  
293 synthesize data from the participant discussions to revise each subsequent draft.

### 294 **Part 3: Reporting Guideline**

295 The objectives of this part are to develop, refine, publish, and disseminate the reporting guideline  
296 for methodological studies. We have registered the development of the reporting guideline—  
297 Methodological Study reporTIng Checklist (MISTIC)—with the EQUATOR Network [54]. This  
298 record may see updates to its name and acronym after deliberations during the consensus study.  
299 We will also consider which reporting items are appropriate for different categories of  
300 methodological studies. This will include discussions about whether a decision tree may be  
301 useful to direct users to other existing reporting guidelines should they be more appropriate for  
302 specific categories of methodological studies (e.g. STROBE for methodological studies designed  
303 as cohort studies). Quantitative and qualitative findings from the consensus study will be  
304 incorporated into the final guideline document to include the: a) recommended methodological  
305 study name(s) and categories, b) recommended checklist with agreed upon reporting items, c)  
306 user guide and elaboration (e.g. an explanation of why it is important, rationales and an example  
307 of how it can be presented in a methodological study), and d) consensus statement. The draft  
308 document will be returned to the steering group and stakeholders to collect additional feedback.  
309 The checklist will be tested with end-users for face validity and clarity, and for additional fine-  
310 tuning as needed prior to publication. We will distribute the finalized checklist to a group of  
311 authors of methodological studies identified from the review (Part 1) to assess its usefulness and  
312 whether the checklist appropriately captures items relevant to the reporting of methodological  
313 studies [55].

### 314 ***Patient and public involvement***

315 Although patients and the general public are not directly involved in this project, the findings of  
316 this research will be relevant to a broad range of knowledge users including methodological

1  
2  
3 317 study authors, health researchers, methodologists, statisticians, and journal editors. We will seek  
4  
5 318 recommendations from investigators for general public members and patients that could be  
6  
7 319 recruited for this project.  
8  
9

10 320

## 11 321 **ETHICS AND DISSEMINATION**

12  
13  
14 322 This research has received an exemption (October 2019) from the Hamilton Integrated Research  
15  
16 323 Ethics Board (HiREB) for the consensus study. Ethics committee approval and consent to  
17  
18 324 participate is not required for any other component of this project since only previously  
19  
20 325 published data will be used.  
21  
22

### 23 326 *Data deposition and curation*

24  
25  
26 327 All participant records and data will be stored in MacDrive, a secure cloud storage drive that is  
27  
28 328 privately hosted and based in-house at McMaster University [56]. Only two researchers (DOL  
29  
30 329 and LM) will have direct access to study related documents and source data. Qualitative data will  
31  
32 330 be promptly coded and transcribed, and all audio files will be encrypted. As part of our  
33  
34 331 knowledge translation (KT) strategy and a consequence of the difficulties we faced in retrieving  
35  
36 332 methodological studies from literature databases during our pilot work, we have developed an  
37  
38 333 open-access database of methodological studies ([www.methodsresearch.ca](http://www.methodsresearch.ca)). We will catalogue  
39  
40 334 all included studies from the pilot and full reviews on this website such that end-users can easily  
41  
42 335 retrieve these studies. We have also setup a submission portal for researchers to submit their  
43  
44 336 studies to be catalogued in this database. Parallel research by our colleagues will use this  
45  
46 337 database as well as explore the automation of retrieving and indexing methodological studies in a  
47  
48 338 dedicated space [57]. Lastly, we will setup a complementary website to serve as the primary  
49  
50 339 repository for the published reporting guideline document.  
51  
52  
53  
54  
55  
56  
57  
58  
59  
60

1  
2  
3 340 ***Dissemination***  
4

5 341 We will publish all manuscripts arising from this research and present the findings at  
6  
7 342 conferences. We will setup a complementary website to serve as the primary repository for the  
8  
9 343 published reporting guideline document. The inclusion of knowledge users and representatives  
10  
11 344 from methodology journals and guideline groups on our core study team will aid the wide  
12  
13 345 dissemination of the reporting guideline. We continue to contact journal editors for their  
14  
15 346 endorsement, and encourage researchers to reach out to us about this work, as we have done  
16  
17 347 previously [34]. We will also encourage user feedback to inform future updates of the guideline  
18  
19 348 as needed. These approaches are informed by our collective experience in developing and  
20  
21 349 disseminating health research guidelines [7, 58-62].  
22  
23  
24  
25

26 350

27  
28 351 **DISCUSSION**  
29

30 352 Our work is contributing to reducing research waste by: 1) making methodological studies  
31  
32 353 transparent through streamlining their reporting; 2) permitting researchers to appraise  
33  
34 354 methodological studies based on adherence to proposed guidelines; 3) allowing end-users of  
35  
36 355 methodological studies to be able to locate inaccessible research in a dedicated database and  
37  
38 356 promoting its continued development; and in doing so 4) allowing end-users of methodological  
39  
40 357 studies to better evaluate and identify issues with study design and reporting that influence  
41  
42 358 patient health, enabling them to apply methodological study evidence to their own research  
43  
44 359 practices. Many methodological studies are done to improve the design, conduct, analysis and  
45  
46 360 reporting of primary and secondary research. We anticipate that, in reviewing this body of  
47  
48 361 evidence on research methods, we will further highlight the importance of studies that aim to  
49  
50 362 improve the design of health research [63].  
51  
52  
53  
54  
55  
56  
57  
58  
59  
60

1  
2  
3 363 ***Strengths and limitations***  
4

5 364 We acknowledge that there are inherent challenges in the search and retrieval of studies that lack  
6  
7 365 consistent names, or dedicated indexing in common health research databases. As such, it is  
8  
9  
10 366 plausible that certain methodological studies that use terms not previously identified in the pilot  
11  
12 367 or from our systematic database searches may be missed. To mitigate this limitation, we will  
13  
14 368 (and have already) contact(ed) experts in the field to identify additional studies, and screen  
15  
16 369 references and citing articles of relevant studies. We have consulted extensively with librarians at  
17  
18 370 the McMaster Health Sciences Library on optimal approaches to capture the maximum number  
19  
20  
21 371 of studies.  
22

23  
24 372 The uncertainty in the number of methodological studies that are currently available and  
25  
26 373 published in the literature can present additional logistic and timing constraints to the review  
27  
28 374 component and overall progress of this work. However, given the landscape of methodological  
29  
30 375 studies, we believe it is essential to apply a comprehensive search. To help with the organization  
31  
32 376 of screening and data extraction, we will use robust systematic review management software  
33  
34 377 (*DistillerSR*) [41]. Further, we have designed all screening and data extraction prompts to ensure  
35  
36 378 consistency and replicability of our work.  
37

38  
39 379 Lastly, our study does not incorporate a blinded consensus process and this may impact  
40  
41 380 the flow of discussions during the video conference meetings. We will aim to regulate  
42  
43 381 discussions such that dominant speakers do not steer the discussion and ensuring that all  
44  
45 382 participants have a chance to speak. Additionally, we will share summaries of the discussion and  
46  
47 383 decisions after the meetings. This will allow for participants to privately provide any additional  
48  
49 384 written feedback to the steering group that may not have been addressed.  
50  
51  
52  
53  
54  
55  
56  
57  
58  
59  
60



1  
2  
3 385 A key strength of this research is the diversity of our study team. We have brought  
4  
5 386 together an international, multidisciplinary team with expertise in consensus activities and  
6  
7 387 guideline development, and research methodology and synthesis. This gives us an advantage in  
8  
9  
10 388 the breadth of feedback and fruitful discussions to be had with a wide array of users of the  
11  
12 389 forthcoming guideline. Given the rise in the conduct of methodological studies, a general call for  
13  
14 390 guidelines in the scientific community, and the number of teams that have reached out to us with  
15  
16 391 interest in participating in this work, we are confident that the guideline will be used. However,  
17  
18 392 we fully acknowledge the factors associated with implementation and use of guidelines, notably  
19  
20 393 journal endorsement of the guidelines, the passage of time and other study level characteristics  
21  
22 394 [20, 64-68]. Therefore, our stakeholders include editors from key journals that publish  
23  
24 395 methodological studies such as the *Journal of Clinical Epidemiology*, *BMC Medical Research*  
25  
26 396 *Methodology*, *BMC Systematic Reviews*, *The Campbell Collaboration*, and *Cochrane*.  
27  
28 397 Stakeholders also include representatives from academic programs building capacity, at the  
29  
30 398 master's and doctoral level, in conducting methodological research. To encourage better uptake,  
31  
32 399 it has been suggested that researchers should work collaboratively with journals in the  
33  
34 400 prospective design, knowledge translation, and evaluation of reporting guidelines [69], as well as  
35  
36 401 following up on user feedback and incorporating a system to revise the reporting guidelines  
37  
38 402 when necessary [70]. These strategies have been incorporated in our KT plan.  
39  
40  
41  
42  
43  
44  
45  
46

## 47 404 **CONCLUSIONS**

48  
49 405 This research will improve the transparency of reporting of methodological studies, and help  
50  
51 406 streamline their indexing and easier retrieval in literature databases. This work stands to make a  
52  
53 407 substantial impact by informing research reporting standards for studies that investigate the  
54  
55  
56  
57  
58  
59  
60

1  
2  
3 408 design, conduct, analysis, or reporting of other health studies, and thereby improving the  
4  
5 409 transparency, reliability and replicability of health research, and ultimately benefitting patients  
6  
7 410 and decision makers. Future efforts will focus on field-testing the published checklist with  
8  
9 411 authors of methodological studies, gathering feedback from end-users, and optimizing and  
10  
11 412 adapting the checklist for different typologies of methodological studies as needed.  
12  
13  
14  
15  
16  
17  
18  
19  
20  
21  
22  
23  
24  
25  
26  
27  
28  
29  
30  
31  
32  
33  
34  
35  
36  
37  
38  
39  
40  
41  
42  
43  
44  
45  
46  
47  
48  
49  
50  
51  
52  
53  
54  
55  
56  
57  
58  
59  
60

413 **REFERENCES**

- 414 1. Chalmers I, Glasziou P: Avoidable waste in the production and reporting of research  
415 evidence. *Lancet* 2009, 374(9683):86-89.
- 416 2. Chan AW, Song F, Vickers A, Jefferson T, Dickersin K, Gotzsche PC, Krumholz HM,  
417 Gherzi D, van der Worp HB: Increasing value and reducing waste: addressing  
418 inaccessible research. *Lancet* 2014, 383(9913):257-266.
- 419 3. Ioannidis JP, Greenland S, Hlatky MA, Khoury MJ, Macleod MR, Moher D, Schulz KF,  
420 Tibshirani R: Increasing value and reducing waste in research design, conduct, and  
421 analysis. *Lancet* 2014, 383(9912):166-175.
- 422 4. Bae JM: Meta-epidemiology. *Epidemiol Health* 2014, 36:e2014019.
- 423 5. Buscemi N, Hartling L, Vandermeer B, Tjosvold L, Klassen TP: Single data extraction  
424 generated more errors than double data extraction in systematic reviews. *J Clin  
425 Epidemiol* 2006, 59(7):697-703.
- 426 6. Sun X, Briel M, Busse JW, You JJ, Akl EA, Mejza F, Bala MM, Bassler D, Mertz D,  
427 Diaz-Granados N *et al*: Credibility of claims of subgroup effects in randomised  
428 controlled trials: systematic review. *BMJ* 2012, 344:e1553.
- 429 7. Moher D, Liberati A, Tetzlaff J, Altman DG, Group P: Preferred reporting items for  
430 systematic reviews and meta-analyses: the PRISMA statement. *J Clin Epidemiol* 2009,  
431 62(10):1006-1012.
- 432 8. Schulz KF, Altman DG, Moher D, Group C: CONSORT 2010 statement: updated  
433 guidelines for reporting parallel group randomised trials. *BMJ* 2010, 340:c332.
- 434 9. von Elm E, Altman DG, Egger M, Pocock SJ, Gotzsche PC, Vandenbroucke JP, Initiative  
435 S: The Strengthening the Reporting of Observational Studies in Epidemiology

- 1  
2  
3 436 (STROBE) statement: guidelines for reporting observational studies. *J Clin Epidemiol*  
4  
5 437 2008, 61(4):344-349.  
6  
7  
8 438 10. Thabane L, Hopewell S, Lancaster GA, Bond CM, Coleman CL, Campbell MJ, Eldridge  
9  
10 439 SM: Methods and processes for development of a CONSORT extension for reporting  
11  
12 440 pilot randomized controlled trials. *Pilot Feasibility Stud* 2016, 2:25.  
13  
14  
15 441 11. Babic A, Vuka I, Saric F, Prolosic I, Slapnicar E, Cavar J, Poklepovic Pericic T, Pieper  
16  
17 442 D, Puljak L: Overall bias methods and their use in sensitivity analysis of Cochrane  
18  
19 443 reviews were not consistent. *J Clin Epidemiol* 2019, 119:57-64.  
20  
21  
22 444 12. Ritchie A, Seubert L, Clifford R, Perry D, Bond C: Do randomised controlled trials  
23  
24 445 relevant to pharmacy meet best practice standards for quality conduct and reporting? A  
25  
26 446 systematic review. *Int J Pharm Pract* 2019.  
27  
28  
29 447 13. Croitoru DO, Huang Y, Kurdina A, Chan AW, Drucker AM: Quality of reporting in  
30  
31 448 systematic reviews published in dermatology journals. *Br J Dermatol* 2019.  
32  
33  
34 449 14. Khan MS, Ochani RK, Shaikh A, Vaduganathan M, Khan SU, Fatima K, Yamani N,  
35  
36 450 Mandrola J, Doukky R, Krasuski RA: Assessing the Quality of Reporting of Harms in  
37  
38 451 Randomized Controlled Trials Published in High Impact Cardiovascular Journals. *Eur*  
39  
40 452 *Heart J Qual Care Clin Outcomes* 2019.  
41  
42  
43 453 15. Rosmarakis ES, Soteriades ES, Vergidis PI, Kasiakou SK, Falagas ME: From conference  
44  
45 454 abstract to full paper: differences between data presented in conferences and journals.  
46  
47 455 *FASEB J* 2005, 19(7):673-680.  
48  
49  
50 456 16. Mueller M, D'Addario M, Egger M, Cevallos M, Dekkers O, Mugglin C, Scott P:  
51  
52 457 Methods to systematically review and meta-analyse observational studies: a systematic  
53  
54 458 scoping review of recommendations. *BMC Med Res Methodol* 2018, 18(1):44.  
55  
56  
57  
58  
59  
60

- 1  
2  
3 459 17. Farrokhyar F, Chu R, Whitlock R, Thabane L: A systematic review of the quality of  
4  
5 460 publications reporting coronary artery bypass grafting trials. *Can J Surg* 2007, 50(4):266-  
6  
7 461 277.
- 8  
9  
10 462 18. Li G, Abbade LPF, Nwosu I, Jin Y, Leenus A, Maaz M, Wang M, Bhatt M, Zielinski L,  
11  
12 463 Sanger N *et al*: A scoping review of comparisons between abstracts and full reports in  
13  
14 464 primary biomedical research. *BMC Med Res Methodol* 2017, 17(1):181.
- 15  
16  
17 465 19. Kuriyama A, Takahashi N, Nakayama T: Reporting of critical care trial abstracts: a  
18  
19 466 comparison before and after the announcement of CONSORT guideline for abstracts.  
20  
21 467 *Trials* 2017, 18(1):32.
- 22  
23  
24 468 20. Mbuagbaw L, Thabane M, Vanniyasingam T, Borg Debono V, Kosa S, Zhang S, Ye C,  
25  
26 469 Parpia S, Dennis BB, Thabane L: Improvement in the quality of abstracts in major  
27  
28 470 clinical journals since CONSORT extension for abstracts: a systematic review. *Contemp*  
29  
30 471 *Clin Trials* 2014, 38(2):245-250.
- 31  
32  
33 472 21. Armijo-Olivo S, Fuentes J, da Costa BR, Saltaji H, Ha C, Cummings GG: Blinding in  
34  
35 473 Physical Therapy Trials and Its Association with Treatment Effects: A Meta-  
36  
37 474 epidemiological Study. *Am J Phys Med Rehabil* 2017, 96(1):34-44.
- 38  
39  
40 475 22. Kovic B, Zoratti MJ, Michalopoulos S, Silvestre C, Thorlund K, Thabane L: Deficiencies  
41  
42 476 in addressing effect modification in network meta-analyses: a meta-epidemiological  
43  
44 477 survey. *J Clin Epidemiol* 2017, 88:47-56.
- 45  
46  
47 478 23. Deliu N, Cottone F, Collins GS, Anota A, Efficace F: Evaluating methodological quality  
48  
49 479 of Prognostic models Including Patient-reported Health outcomes in oncology  
50  
51 480 (EPIPHANY): a systematic review protocol. *BMJ Open* 2018, 8(10):e025054.
- 52  
53  
54  
55  
56  
57  
58  
59

- 1  
2  
3 481 24. Kosa SD, Mbuagbaw L, Borg Debono V, Bhandari M, Dennis BB, Ene G, Leenus A, Shi  
4  
5 482 D, Thabane M, Valvasori S *et al*: Agreement in reporting between trial publications and  
6  
7 483 current clinical trial registry in high impact journals: A methodological review. *Contemp*  
8  
9 484 *Clin Trials* 2018, 65:144-150.
- 10  
11  
12 485 25. Schandelmaier S, Chang Y, Devasenapathy N, Devji T, Kwong JSW, Colunga Lozano  
13  
14 486 LE, Lee Y, Agarwal A, Bhatnagar N, Ewald H *et al*: A systematic survey identified 36  
15  
16 487 criteria for assessing effect modification claims in randomized trials or meta-analyses. *J*  
17  
18 488 *Clin Epidemiol* 2019, 113:159-167.
- 19  
20  
21 489 26. Zhang Y, Florez ID, Colunga Lozano LE, Aloweni FAB, Kennedy SA, Li A, Craigie S,  
22  
23 490 Zhang S, Agarwal A, Lopes LC *et al*: A systematic survey on reporting and methods for  
24  
25 491 handling missing participant data for continuous outcomes in randomized controlled  
26  
27 492 trials. *J Clin Epidemiol* 2017, 88:57-66.
- 28  
29  
30 493 27. Ioannidis JPA: Meta-research: Why research on research matters. *PLoS Biol* 2018,  
31  
32 494 16(3):e2005468.
- 33  
34  
35 495 28. Murad MH, Wang Z: Guidelines for reporting meta-epidemiological methodology  
36  
37 496 research. *Evid Based Med* 2017, 22(4):139-142.
- 38  
39  
40 497 29. El Dib R, Tikkinen KAO, Akl EA, Gomaa HA, Mustafa RA, Agarwal A, Carpenter CR,  
41  
42 498 Zhang Y, Jorge EC, Almeida R *et al*: Systematic survey of randomized trials evaluating  
43  
44 499 the impact of alternative diagnostic strategies on patient-important outcomes. *J Clin*  
45  
46 500 *Epidemiol* 2017, 84:61-69.
- 47  
48  
49 501 30. Tanniou J, van der Tweel I, Teerenstra S, Roes KC: Subgroup analyses in confirmatory  
50  
51 502 clinical trials: time to be specific about their purposes. *BMC Med Res Methodol* 2016,  
52  
53 503 16:20.

- 1  
2  
3 504 31. Puljak L: Methodological studies evaluating evidence are not systematic reviews. *J Clin*  
4  
5 505 *Epidemiol* 2019, 110:98-99.  
6  
7  
8 506 32. Granholm A, Anthon CT, Perner A, Laake JH, Moller MH: Transparent and systematic  
9  
10 507 reporting of meta-epidemiological studies. *J Clin Epidemiol* 2019, 112:93-95.  
11  
12 508 33. Rice DB, Moher D: Curtailing the Use of Preregistration: A Misused Term. *Perspect*  
13  
14 509 *Psychol Sci* 2019, 14(6):1105-1108.  
15  
16  
17 510 34. Lawson DO, Thabane L, Mbuagbaw L: A call for consensus guidelines on classification  
18  
19 511 and reporting of methodological studies. *J Clin Epidemiol* 2020.  
20  
21  
22 512 35. Penning de Vries BBL, van Smeden M, Rosendaal FR, Groenwold RHH: Title, abstract  
23  
24 513 and keyword searching resulted in poor recovery of articles in systematic reviews of  
25  
26 514 epidemiologic practice. *J Clin Epidemiol* 2020.  
27  
28  
29 515 36. Puljak L: Reporting checklist for methodological, that is, research on research studies is  
30  
31 516 urgently needed. *J Clin Epidemiol* 2019, 112:93.  
32  
33  
34 517 37. Moher D, Schulz KF, Simera I, Altman DG: Guidance for developers of health research  
35  
36 518 reporting guidelines. *PLoS Med* 2010, 7(2):e1000217.  
37  
38  
39 519 38. Lawson DO, Leenus A, Mbuagbaw L: Mapping the nomenclature, methodology, and  
40  
41 520 reporting of studies that review methods: a pilot methodological review. *Pilot Feasibility*  
42  
43 521 *Stud* 2020, 6(13):1-11.  
44  
45  
46 522 39. McGowan J, Sampson M, Salzwedel DM, Cogo E, Foerster V, Lefebvre C: PRESS Peer  
47  
48 523 Review of Electronic Search Strategies: 2015 Guideline Statement. *J Clin Epidemiol*  
49  
50 524 2016, 75:40-46.  
51  
52  
53 525 40. Ouzzani M, Hammady H, Fedorowicz Z, Elmagarmid A: Rayyan-a web and mobile app  
54  
55 526 for systematic reviews. *Syst Rev* 2016, 5(1):210.  
56  
57  
58  
59  
60

- 1  
2  
3 527 41. DistillerSR. In. Ottawa, Canada: Evidence Partners; 2019.  
4  
5 528 42. Viera AJ, Garrett JM: Understanding interobserver agreement: the kappa statistic. *Fam*  
6  
7 529 *Med* 2005, 37(5):360-363.  
8  
9  
10 530 43. Cohen J: A Coefficient of Agreement for Nominal Scales. *Educational and*  
11  
12 531 *Psychological Measurement* 1960, 20(1):37-46.  
13  
14 532 44. Hesse-Biber SN, Leavy P: Handbook of emergent methods. New York: Guilford Press;  
15  
16 533 2008.  
17  
18 534 45. Corden A, Sainsbury R, Unit UoYSPR: Using Verbatim Quotations in Reporting  
19  
20 535 Qualitative Social Research: Researchers' Views: University of York, Social Policy  
21  
22 536 Research Unit; 2006.  
23  
24 537 46. Stata Statistical Software. In., vol. Release 15.1. College Station, TX: StataCorp LLC;  
25  
26 538 2018.  
27  
28 539 47. Jones J, Hunter D: Consensus methods for medical and health services research. *BMJ*  
29  
30 540 1995, 311(7001):376-380.  
31  
32 541 48. LimeSurvey: an open source survey tool. In. Hamburg, Germany: Limesurvey GmbH;  
33  
34 542 2019.  
35  
36 543 49. Ayre C, Scally AJ: Critical values for Lawshe's content validity ratio: revisiting the  
37  
38 544 original methods of calculation. *Measurement and Evaluation in Counseling and*  
39  
40 545 *Development* 2014, 47(1):79-86.  
41  
42 546 50. Wilson FR, Pan W, Schumsky DA: Recalculation of the critical values for Lawshe's  
43  
44 547 content validity ratio. *Measurement and Evaluation in Counseling and Development*  
45  
46 548 2012, 45(3):197-210.  
47  
48 549 51. Zoom Video Communications, Inc. In. San Jose, United States; 2020.  
49  
50  
51  
52  
53  
54  
55  
56  
57  
58  
59  
60



- 1  
2  
3 550 52. Holey EA, Feeley JL, Dixon J, Whittaker VJ: An exploration of the use of simple  
4  
5 551 statistics to measure consensus and stability in Delphi studies. *BMC Med Res Methodol*  
6  
7 552 2007, 7:52.  
8  
9  
10 553 53. Dedoose: web application for managing, analyzing, and presenting qualitative and mixed  
11  
12 554 method research data. In., 7.0.23 edn. Los Angeles, CA: SocioCultural Research  
13  
14 555 Consultants, LLC; 2016.  
15  
16  
17 556 54. MISTIC - MethodologIcal Study reporTing Checklist: guidelines for reporting  
18  
19 557 methodological studies in health research [[http://www.equator-  
24  
25  
26 560 55. Streiner DL, Norman GR, Cairney J: Health measurement scales : a practical guide to  
27  
28 561 their development and use, Fifth edition. edn. Oxford: Oxford University Press; 2015.  
29  
30  
31 562 56. MacDrive. In. Hamilton, ON: McMaster University; 2019.  
32  
33 563 57. SNSF - P3 Research Database: Project 190566 \[<http://p3.snf.ch/Project-190566>\]  
34  
35 564 58. Collins GS, Reitsma JB, Altman DG, Moons KG: Transparent Reporting of a  
36  
37 565 multivariable prediction model for Individual Prognosis or Diagnosis \(TRIPOD\): the  
38  
39 566 TRIPOD statement. \*Ann Intern Med\* 2015, 162\(1\):55-63.  
40  
41  
42 567 59. Eldridge SM, Chan CL, Campbell MJ, Bond CM, Hopewell S, Thabane L, Lancaster GA,  
43  
44 568 group Pc: CONSORT 2010 statement: extension to randomised pilot and feasibility trials.  
45  
46 569 \*Pilot Feasibility Stud\* 2016, 2:64.  
47  
48  
49 570 60. Guyatt GH, Oxman AD, Vist GE, Kunz R, Falck-Ytter Y, Alonso-Coello P, Schunemann  
50  
51 571 HJ, Group GW: GRADE: an emerging consensus on rating quality of evidence and  
52  
53 572 strength of recommendations. \*BMJ\* 2008, 336\(7650\):924-926.  
54  
55  
56  
57  
58  
59  
60](http://www.equator-<br/>20<br/>21 558 network.org/library/reporting-guidelines-under-development/reporting-guidelines-under-<br/>22<br/>23 559 development-for-other-study-designs/#MISTIC)

- 1  
2  
3 573 61. Welch V, Petticrew M, Tugwell P, Moher D, O'Neill J, Waters E, White H, group PR-  
4  
5 574 EB: PRISMA-Equity 2012 extension: reporting guidelines for systematic reviews with a  
6  
7 575 focus on health equity. *PLoS Med* 2012, 9(10):e1001333.
- 8  
9  
10 576 62. Wolff RF, Moons KGM, Riley RD, Whiting PF, Westwood M, Collins GS, Reitsma JB,  
11  
12 577 Kleijnen J, Mallett S, Groupdagger P: PROBAST: A Tool to Assess the Risk of Bias and  
13  
14 578 Applicability of Prediction Model Studies. *Ann Intern Med* 2019, 170(1):51-58.
- 15  
16  
17 579 63. Hardwicke TE, Serghiou S, Janiaud P, Danchev V, Crüwell S, Goodman SN, Ioannidis  
18  
19 580 JPA: Calibrating the scientific ecosystem through meta-research. *Annual Review of*  
20  
21 581 *Statistics and Its Application* 2020, 7(1).
- 22  
23  
24 582 64. Bastuji-Garin S, Sbidian E, Gaudy-Marqueste C, Ferrat E, Roujeau JC, Richard MA,  
25  
26 583 Canoui-Poitrine F, European Dermatology N: Impact of STROBE statement publication  
27  
28 584 on quality of observational study reporting: interrupted time series versus before-after  
29  
30 585 analysis. *PLoS One* 2013, 8(8):e64733.
- 31  
32  
33 586 65. Jin Y, Sanger N, Shams I, Luo C, Shahid H, Li G, Bhatt M, Zielinski L, Bantoto B, Wang  
34  
35 587 M *et al*: Does the medical literature remain inadequately described despite having  
36  
37 588 reporting guidelines for 21 years? - A systematic review of reviews: an update. *J*  
38  
39 589 *Multidiscip Healthc* 2018, 11:495-510.
- 40  
41  
42 590 66. Mills EJ, Wu P, Gagnier J, Devereaux PJ: The quality of randomized trial reporting in  
43  
44 591 leading medical journals since the revised CONSORT statement. *Contemp Clin Trials*  
45  
46 592 2005, 26(4):480-487.
- 47  
48  
49 593 67. Moher D, Jones A, Lepage L, Group C: Use of the CONSORT statement and quality of  
50  
51 594 reports of randomized trials: a comparative before-and-after evaluation. *JAMA* 2001,  
52  
53 595 285(15):1992-1995.

- 1  
2  
3 596 68. Samaan Z, Mbuagbaw L, Kosa D, Borg Debono V, Dillenburg R, Zhang S, Fruci V,  
4  
5 597 Dennis B, Bawor M, Thabane L: A systematic scoping review of adherence to reporting  
6  
7 598 guidelines in health care literature. *J Multidiscip Healthc* 2013, 6:169-188.  
9  
10 599 69. Stevens A, Shamseer L, Weinstein E, Yazdi F, Turner L, Thielman J, Altman DG, Hirst  
11  
12 600 A, Hoey J, Palepu A *et al*: Relation of completeness of reporting of health research to  
13  
14 601 journals' endorsement of reporting guidelines: systematic review. *BMJ* 2014, 348:g3804.  
16  
17 602 70. Page MJ, Moher D: Evaluations of the uptake and impact of the Preferred Reporting  
18  
19 603 Items for Systematic reviews and Meta-Analyses (PRISMA) Statement and extensions: a  
20  
21 604 scoping review. *Syst Rev* 2017, 6(1):263.  
23  
24 605

1  
2  
3 **606 AUTHORS' CONTRIBUTIONS**  
4

5 607 DOL and LM conceived the idea. DOL, GG, LM and LT contributed to the design of the study.  
6  
7 608 DOL wrote the first draft of the manuscript. AKN, AWC, BDT, DBA, DM, DP, EMW, GG,  
8  
9 609 GSC, JCJ, LM, LP, LT, MB, PT, RBP, SS, TY, VW and ZS contributed to the refinement of the  
10  
11 610 study methods and critical revision of the manuscript. All authors read and approved the final  
12  
13 611 version of the manuscript.  
14  
15  
16  
17  
18

19 **613 FUNDING**  
20

21 614 This research received no specific grant from any funding agency in the public, commercial or  
22  
23 615 not-for-profit sectors. This project is being carried out as part of a doctoral dissertation by DOL.  
24  
25 616 DOL is supported by an Ontario Graduate Scholarship and the Queen Elizabeth II Graduate  
26  
27 617 Scholarship in Science & Technology, and the Ontario Drug Policy Research Network Student  
28  
29 618 Training Program. The funders had no influence over the design, data collection, analysis,  
30  
31 619 interpretation, preparation of or decision to publish the manuscript.  
32  
33  
34  
35  
36  
37

38 **621 COMPETING INTERESTS**  
39

40 622 All study authors have published methodological studies.  
41  
42  
43  
44

45 **624 ACKNOWLEDGEMENTS**  
46

47 625 We would like to thank Denise Smith and Jack Young at the Health Sciences Library at  
48  
49 626 McMaster University for their critical review of the search strategy. We would like to thank Dr.  
50  
51 627 Susan Jack at the School of Nursing at McMaster University for sharing her expertise and  
52  
53 628 recommendations on qualitative and mixed methods research design.  
54  
55  
56  
57  
58  
59  
60

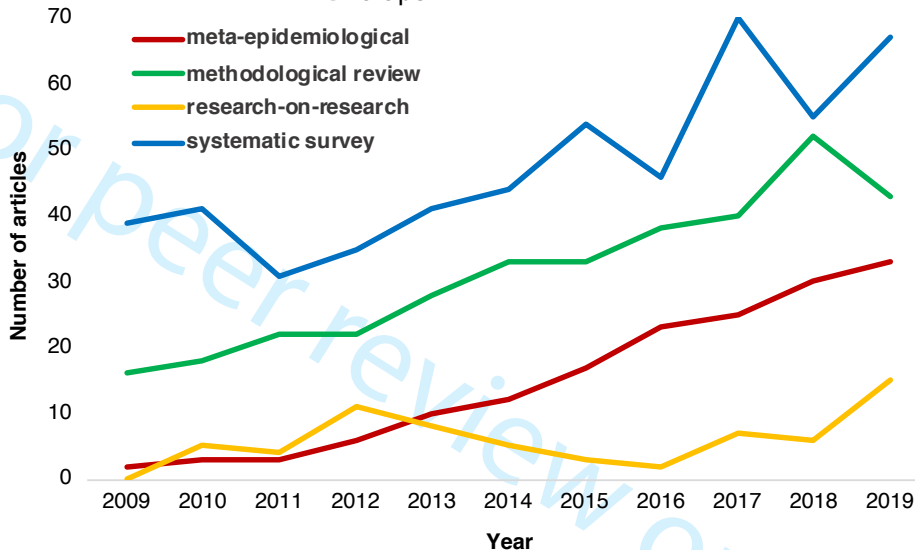

|                              | 2009 | 2010 | 2011 | 2012 | 2013 | 2014 | 2015 | 2016 | 2017 | 2018 | 2019 |
|------------------------------|------|------|------|------|------|------|------|------|------|------|------|
| <b>meta-epidemiological</b>  | 2    | 3    | 3    | 6    | 10   | 12   | 17   | 23   | 25   | 30   | 33   |
| <b>methodological review</b> | 16   | 18   | 22   | 22   | 28   | 33   | 33   | 38   | 40   | 52   | 43   |
| <b>research-on-research</b>  | 0    | 5    | 4    | 11   | 8    | 5    | 3    | 2    | 7    | 6    | 15   |
| <b>systematic survey</b>     | 39   | 41   | 31   | 35   | 41   | 44   | 54   | 46   | 70   | 55   | 67   |

For peer review only - <http://bmjopen.bmj.com/site/about/guidelines.xhtml>

# Methodological Studies

## Features of methodological studies

### Study Aim

*(purpose is to investigate...)*

### Study Design

*(cross-sectional or over time)*

### Sampling Strategy

*(from a target population)*

### Unit of Analysis

## Categories of the feature

1. Bias
2. Methods
3. Reporting
4. Summarize

1. Descriptive
2. Analytical

1. Obtain all
2. Obtain sample

1. Design or analysis type
2. Research record type

## Examples of categories or the factors investigated

1. in **primary studies**, e.g. trial registry vs. final manuscript; in **secondary studies**, e.g. meta-bias
2. **describe** or **test** new methods; **compare** methods
3. **quality**, e.g. adherence to guidelines (CONSORT); **consistency**, e.g. abstract vs. full-text
4. **summarize data** from other methodological studies

1. **outline characteristics**, e.g. survey of randomized trials at predefined timepoint(s)
2. **evaluate groups or change over time**, e.g. different databases, timepoint; **pool data**, e.g. evaluate outcomes via synthesis

1. **systematic search and screen**, e.g. all eligible cohort studies on topic
2. **consecutive sampling**, e.g. first 150 trials on topic; **purposeful sample**, e.g. all eligible abstracts from designated journal(s); **random sample**, e.g. randomized selection from all eligible records

1. **design type**, e.g. randomized trial; **analysis type**, e.g. dose-response meta-analysis
2. **record type**, e.g. abstract, published manuscript, protocol document, registry entry

1 **1. Identifying the need for a guideline, review**  
2 **of the literature and obtain funding** for the  
3 guideline initiative

- ✓ Identify previous relevant guidance
- ✓ Establish feasibility for full review of methodological studies
- ✓ Funding sought
- Complete full review of methodological studies

4  
5  
6 **2. Pre-meeting activities including identification**  
7 **of stakeholders, a consensus exercise,**  
8 **and generation of a list of items** for  
9 consideration at the consensus meeting

- ✓ Establish working group, identification of stakeholders
- Share full review findings
- Ethics, online consensus exercise, and generation of a list of candidate items

10  
11  
12  
13 **3. Consensus meeting and discussion of a**  
14 **knowledge translation strategy**

- Conduct video conference meetings and final consensus meeting
- Share guideline (draft)
- Collect feedback

15  
16  
17  
18  
19 **4. Post-meeting activities including development**  
20 **and publication of the guidance** statement

- Disseminate guideline (final)

21  
22  
23 **5. Post-publication activities including**  
24 **encouragement of endorsement,**  
25 **adherence, web site development and**  
26 **translation of the guideline**

- ✓ Build and populate database of methodological studies
- Knowledge translation strategies for guideline, website and database

Completed In progress Not started

## SUPPLEMENTARY FILE

## Timeline of the development of reporting guidelines:

| OBJECTIVES & STEPS |                                                                         | DURATION<br>(MONTHS) | YEAR 1 (2021) |    |    |    | YEAR 2 (2022) |    |    |    |
|--------------------|-------------------------------------------------------------------------|----------------------|---------------|----|----|----|---------------|----|----|----|
|                    |                                                                         |                      | Q1            | Q2 | Q3 | Q4 | Q1            | Q2 | Q3 | Q4 |
| 1                  | <b>Methodological review</b> of the literature                          | 8                    | ●             | ●  |    |    |               |    |    |    |
| 2                  | Development of an <b>electronic database</b> for methodological studies | 8                    |               | ●  | ●  |    |               |    |    |    |
| 3                  | <b>Consensus study</b> and development of a <b>reporting guideline</b>  | 6                    |               |    | ●  | ●  | ●             | ●  |    |    |
| 4                  | Knowledge translation activities                                        | —                    | ●             | ●  | ●  | ●  | ●             | ●  | ●  | ●  |

Q: quarter.



SUPPLEMENTARY FILE

Flow of data for informing subsequent stages of the project:

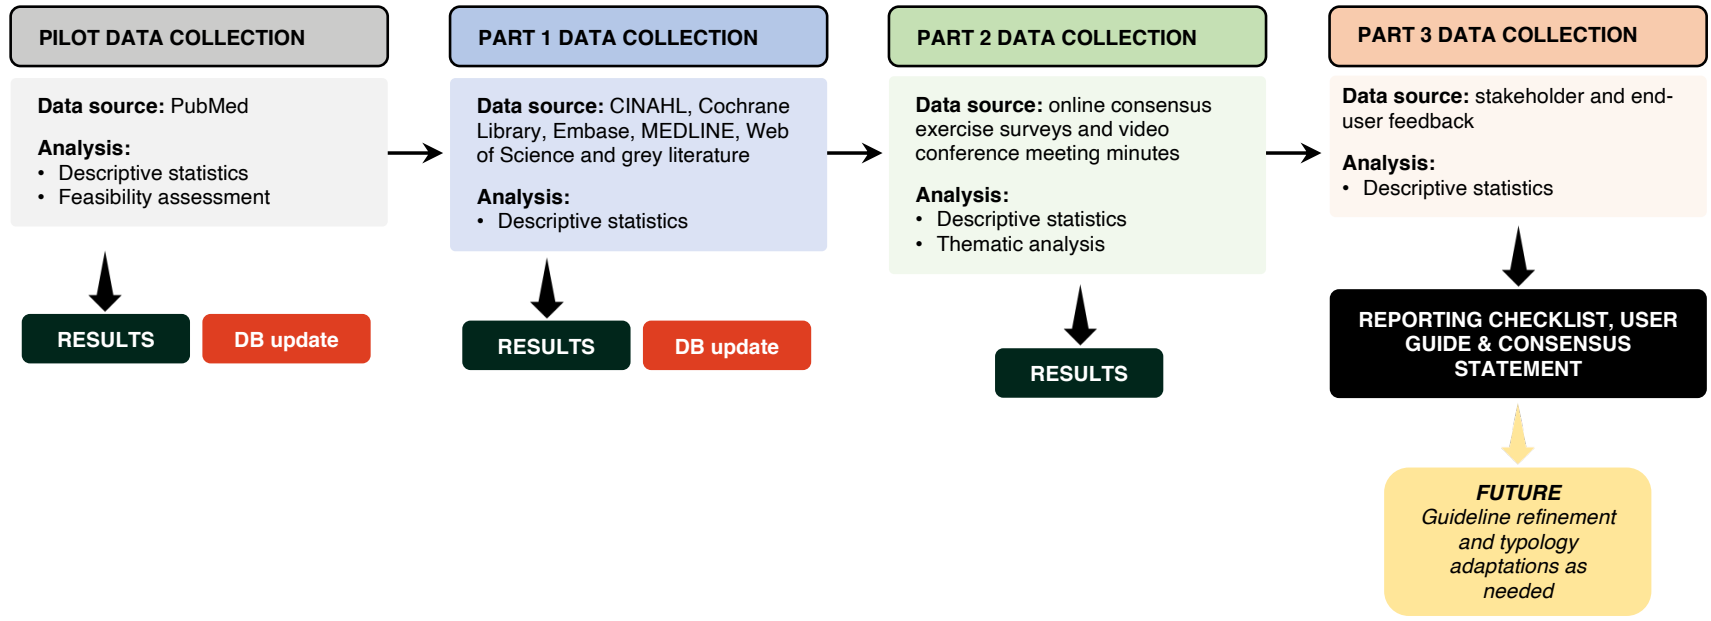

CINAHL: Cumulative Index for Nursing and Allied Health Literature, DB: database ([www.methodsresearch.ca](http://www.methodsresearch.ca))

For peer review only

1  
2  
3  
4  
5  
6  
7  
8  
9  
10  
11  
12  
13  
14  
15  
16  
17  
18  
19  
20  
21  
22  
23  
24  
25  
26  
27  
28  
29  
30  
31  
32  
33  
34  
35  
36  
37  
38  
39  
40  
41  
42  
43  
44  
45  
46  
47

## SUPPLEMENTARY FILE

### Sample search strategy for MEDLINE:

*Concept: names of methodological studies*

- 1 (meta-epidemiolog\* OR metaepidemiolog\* OR meta-research OR methodolog\* analysis OR
- 2 methodolog\* evidence OR methodolog\* investigation OR methodolog\* literature OR
- 3 methodolog\* overview OR methodolog\* report\* OR methodolog\* review OR methodolog\*
- 4 survey OR methodolog\* synthesis OR method\* overview OR systematic database review OR
- 5 systematic literature survey OR systematic survey).mp.
- 6
- 7
- 8
- 9
- 10
- 11
- 12
- 13
- 14 2 (methodolog\* study OR method\* review OR method\* survey)

*Concept: topics in methodological research (i.e. analysis, design and reporting)*

- 3 exp Data Collection/
- 4 exp Data Interpretation, Statistical/
- 5 exp Epidemiologic Research Design/
- 6 exp Nursing Methodology Research/
- 7 exp Reproducibility of Results/
- 8 exp Research Design/
- 9 3 OR 4 OR 5 OR 6 OR 7 OR 8
- 10 2 AND 9

*Concept: methodological studies that are called 'systematic reviews'*

- 11 systematic review.mp.
- 12 Cochrane Database of Systematic Reviews.jn
- 13 11 NOT 12
- 14 \*Data Collection/
- 15 \*Data Interpretation, Statistical/
- 16 \*Epidemiologic Research Design/
- 17 \*Nursing Methodology Research/
- 18 \*Reproducibility of Results/
- 19 \*Research Design/
- 20 14 OR 15 OR 16 OR 17 OR 18 OR 19
- 21 13 AND 20
- 22 1 OR 10 OR 21
