# Supplementary material for: Reporting of methodological studies in health research: a protocol for the development of the MethodologIcal STudy reportIng Checklist (MISTIC)
Source: PubMed Central journal article supplement — BMJ Open. 2020 Dec 17;10(12):e040478. doi: 10.1136/bmjopen-2020-040478 (PMC7747548; doi:10.1136/bmjopen-2020-040478), 2020-12-17
Supplement: bmjopen-2020-040478supp001.pdf [file bmjopen-2020-040478supp001.pdf]

## SUPPLEMENTARY FILE

## Timeline of the development of reporting guidelines:

| OBJECTIVES & STEPS |                                                                         | DURATION<br>(MONTHS) | YEAR 1 (2021) |    |    |    | YEAR 2 (2022) |    |    |    |
|--------------------|-------------------------------------------------------------------------|----------------------|---------------|----|----|----|---------------|----|----|----|
|                    |                                                                         |                      | Q1            | Q2 | Q3 | Q4 | Q1            | Q2 | Q3 | Q4 |
| 1                  | <b>Methodological review</b> of the literature                          | 8                    | ●             | ●  |    |    |               |    |    |    |
| 2                  | Development of an <b>electronic database</b> for methodological studies | 8                    |               | ●  | ●  |    |               |    |    |    |
| 3                  | <b>Consensus study</b> and development of a <b>reporting guideline</b>  | 6                    |               |    | ●  | ●  | ●             | ●  |    |    |
| 4                  | Knowledge translation activities                                        | —                    | ●             | ●  | ●  | ●  | ●             | ●  | ●  | ●  |

Q: quarter.

## SUPPLEMENTARY FILE

## Flow of data for informing subsequent stages of the project:

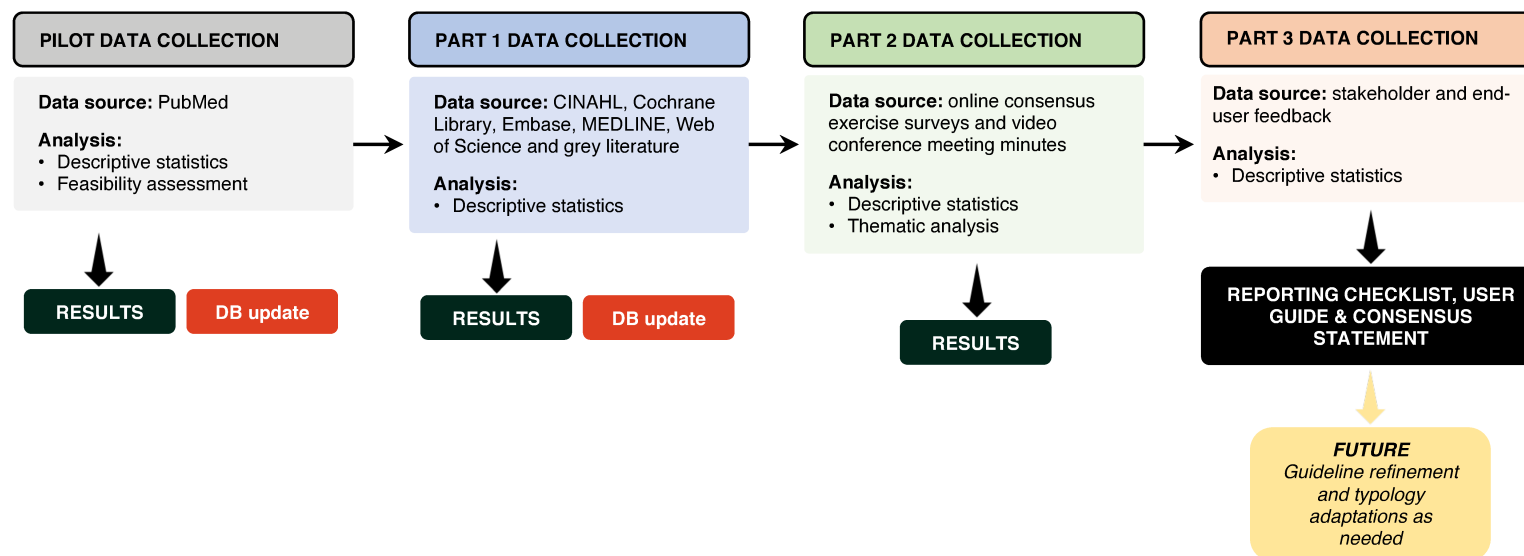

CINAHL: Cumulative Index for Nursing and Allied Health Literature, DB: database ([www.methodsresearch.ca](http://www.methodsresearch.ca))

## SUPPLEMENTARY FILE

### Sample search strategy for MEDLINE:

#### *Concept: names of methodological studies*

- 1 (meta-epidemiolog\* OR metaepidemiolog\* OR meta-research OR methodolog\* analysis OR methodolog\* evidence OR methodolog\* investigation OR methodolog\* literature OR methodolog\* overview OR methodolog\* report\* OR methodolog\* review OR methodolog\* survey OR methodolog\* synthesis OR method\* overview OR systematic database review OR systematic literature survey OR systematic survey).mp.
- 2 (methodolog\* study OR method\* review OR method\* survey)

#### *Concept: topics in methodological research (i.e. analysis, design and reporting)*

- 3 exp Data Collection/
- 4 exp Data Interpretation, Statistical/
- 5 exp Epidemiologic Research Design/
- 6 exp Nursing Methodology Research/
- 7 exp Reproducibility of Results/
- 8 exp Research Design/
- 9 3 OR 4 OR 5 OR 6 OR 7 OR 8
- 10 2 AND 9

#### *Concept: methodological studies that are called 'systematic reviews'*

- 11 systematic review.mp.
- 12 Cochrane Database of Systematic Reviews.jn
- 13 11 NOT 12
- 14 \*Data Collection/
- 15 \*Data Interpretation, Statistical/
- 16 \*Epidemiologic Research Design/
- 17 \*Nursing Methodology Research/
- 18 \*Reproducibility of Results/
- 19 \*Research Design/
- 20 14 OR 15 OR 16 OR 17 OR 18 OR 19
- 21 13 AND 20
- 22 1 OR 10 OR 21
